# Supplementary material for: Sedimentary ancient DNA and pollen reveal the composition of plant organic matter in Late Quaternary permafrost sediments of the Buor Khaya Peninsula (north-eastern Siberia)
Source: Copernicus journal article supplement (doi:10.5194/bg-14-575-2017), 2017-02-07
Supplement: Supplementary file 2 [file S4_negative_controls.xlsx]

## Sheet: NTC_BLANK
All sequences found in extraction blanks and no template controls (NTC). Samples belonging to the same PCR-batch are framed.
			scientific name		species list		taxid		best identity		depth (m)	0.1	0.85	1.1	1.2	1.3	1.6	1.8	1.9	0.35	2.4	0.55	Blank1	2.6	2.85	3.3	8.35	8.75	8.9	8.95	9	9.15	9.6	2.1	Blank2	9.7	9.9	10.15	10.3	10.4	10.65	10.72	10.9	11.4	11.7	11.85	Blank3	12.12	12.25
filtered	comment	counts	by_db.gh_embl117	by_db.arctborbryo_gh	gh_embl117	arctborbryo_gh	gh_embl117	arctborbryo_gh	gh_embl117	arctborbryo_gh	count	EH111	EH112	EH113	EH114	EH115	EH116	EH117	EH118	EH119	EH120	EH121	BLANK.EH122	EH123	EH124	EH125	EH126	EH127	EH128	EH129	EH130	EH131	EH132	EH133	BLANK.EH134	EH135	EH136	EH137	EH138	EH139	EH140	EH141	EH142	EH143	EH144	EH145	BLANK.EH146	EH147	EH148
NTC_EH1_6_trnL_g_h
filtered out because best identity < 1	only in NTC not in samples	2792	Huperzia	Eukaryota	[Huperzia varia]	[]	37428	2759	0.857143	0.538462	2798	0	0	0	0	0	0	0	0	0	0	0	0	0	0	0	0	0	0	0	20	0	0	0	875	0	0	0	0	0	0	0	0	0	0	0	0	0	0
filtered out because best identity < 1	only in NTC not in samples	63	Streptophyta	Eukaryota	[]	[]	35493	2759	0.666667	0.5	64	0	0	0	0	0	0	0	0	0	0	0	0	0	0	0	0	0	0	0	0	0	0	0	17	0	0	0	0	0	0	0	0	0	0	0	0	0	0
filtered out because best identity < 1	only in NTC and BLANK not in samples	3773	Embryophyta	Eukaryota	[]	[]	3193	2759	0.625	0.5	3786	0	0	0	0	0	0	0	0	0	0	0	10	0	0	0	0	0	0	0	19	0	12	0	975	0	0	0	0	0	0	0	0	0	0	0	0	0	0
filtered out because best identity < 1	only in NTC not in samples	1005	Embryophyta	Embryophyta	[]	[]	3193	3193	0.714286	0.5	1005	0	0	0	0	0	0	0	0	0	0	0	0	0	0	0	0	0	0	0	0	0	0	0	0	0	0	0	0	0	0	0	0	0	0	0	0	0	0
filtered out because best identity < 1	only in NTC not in samples	75	Embryophyta	Eukaryota	[Huperzia varia]	[]	3193	2759	0.833333	0.461538	77	0	0	0	0	0	0	0	0	0	0	0	0	0	0	0	0	0	0	0	0	0	0	0	12	0	0	0	0	0	0	0	0	0	0	0	0	0	0
NTC_EH2_4_trnL_g_h
filtered out because best identity < 1	only in NTC not in samples	11	Streptophyta	Eukaryota	[]	[]	35493	2759	0.541667	0.52	11	0	0	0	0	0	0	0	0	0	0	0	0	0	0	0	0	0	0	0	0	0	0	0	0	0	0	0	0	0	0	0	0	0	0	0	0	0	0
filtered out because best identity < 1	only in NTC not in samples	11	Eukaryota	Eukaryota	[]	[]	2759	2759	0.545455	0.52	11	0	0	0	0	0	0	0	0	0	0	0	0	0	0	0	0	0	0	0	0	0	0	0	0	0	0	0	0	0	0	0	0	0	0	0	0	0	0
filtered out because best identity < 1	only in NTC not in samples	45	Magnoliophyta	Embryophyta	[Elythranthera emarginata, Zygophyllum billardierei, Zygophyllum ovatum, Zygophyllum iodocarpum, Bassia scoparia, Cascadia nuttallii, Dresslerella elvallensis, Euphorbia polycephala]	[]	3398	3193	0.592593	0.516129	45	0	0	0	0	0	0	0	0	0	0	0	0	0	0	0	0	0	0	0	0	0	0	0	0	0	0	0	0	0	0	0	0	0	0	0	0	0	0
filtered out because best identity < 1	only in NTC not in samples	3531	Streptophyta	Eukaryota	[]	[]	35493	2759	0.545455	0.5	3531	0	0	0	0	0	0	0	0	0	0	0	0	0	0	0	0	0	0	0	0	0	0	0	0	0	0	0	0	0	0	0	0	0	0	0	0	0	0
filtered out because best identity < 1	in 2 samples and BLANK	3773	Embryophyta	Eukaryota	[]	[]	3193	2759	0.625	0.5	3786	0	0	0	0	0	0	0	0	0	0	0	10	0	0	0	0	0	0	0	19	0	12	0	975	0	0	0	0	0	0	0	0	0	0	0	0	0	0
filtered out because best identity < 1	only in NTC not in samples	11177	Eukaryota	Eukaryota	[]	[]	2759	2759	0.529412	0.5	11177	0	0	0	0	0	0	0	0	0	0	0	0	0	0	0	0	0	0	0	0	0	0	0	0	0	0	0	0	0	0	0	0	0	0	0	0	0	0
filtered out because best identity < 1	only in NTC not in samples	43264	Embryophyta	Embryophyta	[]	[]	3193	3193	0.551724	0.484848	43264	0	0	0	0	0	0	0	0	0	0	0	0	0	0	0	0	0	0	0	0	0	0	0	0	0	0	0	0	0	0	0	0	0	0	0	0	0	0
filtered out because best identity < 1	only in NTC not in samples	18	Streptophyta	Eukaryota	[]	[]	35493	2759	0.56	0.48	18	0	0	0	0	0	0	0	0	0	0	0	0	0	0	0	0	0	0	0	0	0	0	0	0	0	0	0	0	0	0	0	0	0	0	0	0	0	0
filtered out because best identity < 1	only in NTC not in samples	10	Streptophyta	Eukaryota	[]	[]	35493	2759	0.56	0.48	10	0	0	0	0	0	0	0	0	0	0	0	0	0	0	0	0	0	0	0	0	0	0	0	0	0	0	0	0	0	0	0	0	0	0	0	0	0	0
filtered out because best identity < 1	only in NTC not in samples	18	Eukaryota	Eukaryota	[]	[]	2759	2759	0.48	0.473684	20	0	0	0	0	0	0	0	0	0	0	0	0	0	0	0	0	0	0	0	0	0	0	0	0	0	0	0	0	0	0	0	0	0	0	0	0	0	0
filtered out because best identity < 1	only in NTC not in samples	10599	Eukaryota	Eukaryota	[]	[]	2759	2759	0.473684	0.473684	10599	0	0	0	0	0	0	0	0	0	0	0	0	0	0	0	0	0	0	0	0	0	0	0	0	0	0	0	0	0	0	0	0	0	0	0	0	0	0
filtered out because best identity < 1	only in NTC not in samples	23	Eukaryota	Embryophyta	[]	[]	2759	3193	0.52	0.464286	23	0	0	0	0	0	0	0	0	0	0	0	0	0	0	0	0	0	0	0	0	0	0	0	0	0	0	0	0	0	0	0	0	0	0	0	0	0	0
filtered out because best identity < 1	only in NTC not in samples	24	Eukaryota	Eukaryota	[]	[]	2759	2759	0.538462	0.461538	24	0	0	0	0	0	0	0	0	0	0	0	0	0	0	0	0	0	0	0	0	0	0	0	0	0	0	0	0	0	0	0	0	0	0	0	0	0	0
filtered out because best identity < 1	only in NTC not in samples	11	Eukaryota	Eukaryota	[]	[]	2759	2759	0.428571	0.333333	11	0	0	0	0	0	0	0	0	0	0	0	0	0	0	0	0	0	0	0	0	0	0	0	0	0	0	0	0	0	0	0	0	0	0	0	0	0	0
NTC_EH3_7_8_trnL_g_h
not filtered out	less than 10 counts in NTC: putative tag jumps	4495000	Saliceae	Saliceae	[]	[]	238069	238069	1	1	4495028	0	291707	190973	121377	88809	142	49	11826	5593	349	10176	0	35812	10763	143840	128632	71618	109701	111383	34778	154314	3057	18579	0	0	6573	79281	153429	262957	29664	74078	121152	114024	328211	21743	0	117071	47994
not filtered out	less than 10 counts in NTC: putative tag jumps	3042329	Carex aquatilis	Carex aquatilis	[Carex aquatilis]	[Carex aquatilis]	140788	140788	1	1	3042364	10156	0	0	0	0	0	0	0	0	0	0	0	8341	0	3945	0	1016	0	143	3950	53318	2927	0	0	1523	2060	8062	11866	1172751	2235	1658586	15405	0	0	0	0	10	47
not filtered out	less than 10 counts in NTC: putative tag jumps	521989	Eriophorum	Eriophorum	[]	[Eriophorum callitrix, Eriophorum latifolium, Eriophorum angustifolium, Eriophorum brachyantherum, Eriophorum vaginatum]	46326	46326	1	1	522020	8455	0	20	0	49	5707	190	0	246817	0	11182	0	52851	0	0	272	49	0	62	1097	219	12873	1833	0	28547	5831	18436	1205	35729	32513	5884	40901	6730	0	0	0	29	0
filtered out because best identity < 1	less than 10 counts in NTC: putative tag jumps	27	Eriophorum	Eriophorum	[Eriophorum gracile, Eriophorum angustifolium]	[Eriophorum callitrix, Eriophorum latifolium, Eriophorum angustifolium, Eriophorum brachyantherum, Eriophorum vaginatum]	46326	46326	0.987805	0.987805	46	0	0	0	0	0	0	0	0	15	0	0	0	0	0	0	0	0	0	0	0	0	0	0	0	0	0	0	0	0	0	0	11	0	0	0	0	0	0
filtered out because best identity < 1	only in NTC not in samples	19	Stuckenia	Stuckenia	[Stuckenia filiformis, Stuckenia pectinata]	[Stuckenia filiformis, Stuckenia pectinata, Stuckenia vaginata]	246706	246706	0.988372	0.988372	32	0	0	0	0	0	0	0	0	0	0	0	0	0	0	0	0	0	0	0	0	0	0	0	0	0	0	18	0	0	0	0	0	0	0	0	0	0	0
filtered out because best identity < 1	only in NTC not in samples	11	Embryophyta	Embryophyta	[]	[]	3193	3193	0.615385	0.583333	11	0	0	0	0	0	0	0	0	0	0	0	0	0	0	0	0	0	0	0	0	0	0	0	0	0	0	0	0	0	0	0	0	0	0	0	0	0	0
filtered out because best identity < 1	only in NTC not in samples	150	Embryophyta	Eukaryota	[]	[]	3193	2759	0.608696	0.565217	150	0	0	0	0	0	0	0	0	0	0	0	0	0	0	0	0	0	0	0	0	0	0	0	0	0	0	0	0	0	0	0	0	0	0	0	0	0	0
filtered out because best identity < 1	only in NTC not in samples	15	Embryophyta	Euphyllophyta	[]	[]	3193	78536	0.584906	0.563636	15	0	0	0	0	0	0	0	0	0	0	0	0	0	0	0	0	0	0	0	0	0	0	0	0	0	0	0	0	0	0	0	0	0	0	0	0	0	0
filtered out because best identity < 1	only in NTC not in samples	60264	Embryophyta	Embryophyta	[]	[]	3193	3193	0.642857	0.5625	60265	0	0	0	0	0	0	0	0	0	0	0	0	0	0	0	0	0	0	0	0	0	0	0	0	0	0	0	0	0	0	0	0	0	0	0	0	0	0
filtered out because best identity < 1	only in NTC not in samples	14	Streptophyta	Eukaryota	[]	[]	35493	2759	0.6	0.56	14	0	0	0	0	0	0	0	0	0	0	0	0	0	0	0	0	0	0	0	0	0	0	0	0	0	0	0	0	0	0	0	0	0	0	0	0	0	0
filtered out because best identity < 1	only in NTC not in samples	19949	Embryophyta	Eukaryota	[Drepanolejeunea vesiculosa, Allisonia cockaynii, Cuscuta mcvaughii, Frullanoides mexicana]	[]	3193	2759	0.642857	0.538462	19949	0	0	0	0	0	0	0	0	0	0	0	0	0	0	0	0	0	0	0	0	0	0	0	0	0	0	0	0	0	0	0	0	0	0	0	0	0	0
filtered out because best identity < 1	only in NTC not in samples	14	Embryophyta	Embryophyta	[]	[]	3193	3193	0.585366	0.533333	14	0	0	0	0	0	0	0	0	0	0	0	0	0	0	0	0	0	0	0	0	0	0	0	0	0	0	0	0	0	0	0	0	0	0	0	0	0	0
filtered out because best identity < 1	only in NTC not in samples	39	Embryophyta	Embryophyta	[]	[]	3193	3193	0.547619	0.513514	39	0	0	0	0	0	0	0	0	0	0	0	0	0	0	0	0	0	0	0	0	0	0	0	0	0	0	0	0	0	0	0	0	0	0	0	0	0	0
filtered out because best identity < 1	only in NTC not in samples	12	Embryophyta	Tracheophyta	[]	[]	3193	58023	0.565217	0.511111	12	0	0	0	0	0	0	0	0	0	0	0	0	0	0	0	0	0	0	0	0	0	0	0	0	0	0	0	0	0	0	0	0	0	0	0	0	0	0
filtered out because best identity < 1	only in NTC not in samples	13	Euphyllophyta	Embryophyta	[]	[]	78536	3193	0.577778	0.511111	13	0	0	0	0	0	0	0	0	0	0	0	0	0	0	0	0	0	0	0	0	0	0	0	0	0	0	0	0	0	0	0	0	0	0	0	0	0	0
filtered out because best identity < 1	only in NTC not in samples	23	Embryophyta	Embryophyta	[]	[]	3193	3193	0.553191	0.5	23	0	0	0	0	0	0	0	0	0	0	0	0	0	0	0	0	0	0	0	0	0	0	0	0	0	0	0	0	0	0	0	0	0	0	0	0	0	0
filtered out because best identity < 1	only in NTC not in samples	10	Viridiplantae	Embryophyta	[]	[]	33090	3193	0.542857	0.5	10	0	0	0	0	0	0	0	0	0	0	0	0	0	0	0	0	0	0	0	0	0	0	0	0	0	0	0	0	0	0	0	0	0	0	0	0	0	0
filtered out because best identity < 1	only in NTC not in samples	33	Streptophytina	Embryophyta	[]	[]	131221	3193	0.536585	0.5	33	0	0	0	0	0	0	0	0	0	0	0	0	0	0	0	0	0	0	0	0	0	0	0	0	0	0	0	0	0	0	0	0	0	0	0	0	0	0
filtered out because best identity < 1	only in NTC not in samples	22	Embryophyta	Tracheophyta	[]	[]	3193	58023	0.55814	0.488889	22	0	0	0	0	0	0	0	0	0	0	0	0	0	0	0	0	0	0	0	0	0	0	0	0	0	0	0	0	0	0	0	0	0	0	0	0	0	0
filtered out because best identity < 1	only in NTC not in samples	44	Embryophyta	Embryophyta	[]	[]	3193	3193	0.555556	0.488889	44	0	0	0	0	0	0	0	0	0	0	0	0	0	0	0	0	0	0	0	0	0	0	0	0	0	0	0	0	0	0	0	0	0	0	0	0	0	0
filtered out because best identity < 1	only in NTC not in samples	9548	Eukaryota	Eukaryota	[]	[]	2759	2759	0.52	0.46875	9548	0	0	0	0	0	0	0	0	0	0	0	0	0	0	0	0	0	0	0	0	0	0	0	0	0	0	0	0	0	0	0	0	0	0	0	0	0	0
NTC_EH9_trnL_g_h
not filtered out	less than 10 counts in NTC: putative tag jumps	4495000	Saliceae	Saliceae	[]	[]	238069	238069	1	1	4495028	0	291707	190973	121377	88809	142	49	11826	5593	349	10176	0	35812	10763	143840	128632	71618	109701	111383	34778	154314	3057	18579	0	0	6573	79281	153429	262957	29664	74078	121152	114024	328211	21743	0	117071	47994
not filtered out	less than 10 counts in NTC: putative tag jumps	52980	Festuca	Festuca	[]	[Festuca viviparoidea, Festuca kolymensis]	4605	4605	1	1	53000	0	0	0	0	0	0	0	0	0	0	0	0	0	0	0	0	150	462	258	13	191	2301	0	0	0	0	0	0	343	442	0	1299	769	228	40	0	37647	1142
filtered out because best identity < 1	only in NTC not in samples	16	Magnoliophyta	Magnoliophyta	[]	[]	3398	3398	0.614754	0.547009	16	0	0	0	0	0	0	0	0	0	0	0	0	0	0	0	0	0	0	0	0	0	0	0	0	0	0	0	0	0	0	0	0	0	0	0	13	0	0
BLANK.EH122_trnL_g_h												sample.EH111_trnL_g_h	sample.EH112_trnL_g_h	sample.EH113_trnL_g_h	sample.EH114_trnL_g_h	sample.EH115_trnL_g_h	sample.EH116_trnL_g_h	sample.EH117_trnL_g_h	sample.EH118_trnL_g_h	sample.EH119_trnL_g_h	sample.EH120_trnL_g_h	sample.EH121_trnL_g_h	BLANK.EH122_trnL_g_h
filtered out as food / cultivated plant	only in BLANK not in samples	34132	BEP clade	Magnoliophyta	[]	[]	359160	3398	1	0.942308	34133	0	0	0	0	0	0	0	0	0	0	0	34132
filtered out because best identity < 1	only in BLANK not in samples	12	BEP clade	Poaceae	[Oryza sativa, Oryza australiensis, Brachypodium boissieri]	[]	359160	4479	0.961538	0.903846	12	0	0	0	0	0	0	0	0	0	0	0	12
filtered out because best identity < 1	only in BLANK not in samples	16	BEP clade	Poaceae	[]	[]	359160	4479	0.942308	0.884615	16	0	0	0	0	0	0	0	0	0	0	0	16
filtered out because best identity < 1	only in BLANK not in samples	27	Streptophyta	Embryophyta	[]	[]	35493	3193	0.571429	0.548387	27	0	0	0	0	0	0	0	0	0	0	0	27
filtered out because best identity < 1	only in BLANK not in samples	31	Embryophyta	Embryophyta	[]	[]	3193	3193	0.625	0.545455	33	0	0	0	0	0	0	0	0	0	0	0	31
filtered out because best identity < 1	only in BLANK not in samples	652	Huperzia	Embryophyta	[Huperzia varia]	[]	37428	3193	0.857143	0.538462	659	0	0	0	0	0	0	0	0	0	0	0	652
filtered out because best identity < 1	only in BLANK not in samples	3773	Embryophyta	Eukaryota	[]	[]	3193	2759	0.625	0.5	3786	0	0	0	0	0	0	0	0	0	0	0	10
filtered out because best identity < 1	only in BLANK not in samples	14	Streptophyta	Eukaryota	[]	[]	35493	2759	0.571429	0.482759	14	0	0	0	0	0	0	0	0	0	0	0	14
filtered out because best identity < 1	only in BLANK not in samples	35	Embryophyta	Embryophyta	[Huperzia varia]	[]	3193	3193	0.833333	0.461538	35	0	0	0	0	0	0	0	0	0	0	0	35
BLANK.EH134_trnL_g_h																								sample.EH123_trnL_g_h	sample.EH124_trnL_g_h	sample.EH125_trnL_g_h	sample.EH126_trnL_g_h	sample.EH127_trnL_g_h	sample.EH128_trnL_g_h	sample.EH129_trnL_g_h	sample.EH130_trnL_g_h	sample.EH131_trnL_g_h	sample.EH132_trnL_g_h	sample.EH133_trnL_g_h	BLANK.EH134_trnL_g_h
filtered out because best identity < 1	only in BLANK not in samples	13	Huperzia	Embryophyta	[Huperzia varia]	[Equisetum fluviatile, Equisetum pratense, Equisetum palustre, Moerckia hibernica, Equisetum variegatum, Equisetum arvense, Equisetum scirpoides, Equisetum hyemale, Equisetum sylvaticum]	37428	3193	0.857143	0.615385	17													0	0	0	0	0	0	0	0	0	0	0	13
filtered out because best identity < 1	only in BLANK not in samples	319	Streptophyta	Embryophyta	[]	[]	35493	3193	0.551724	0.551724	319													0	0	0	0	0	0	0	0	0	0	0	319
filtered out because best identity < 1	in 1 sample	2792	Huperzia	Eukaryota	[Huperzia varia]	[]	37428	2759	0.857143	0.538462	2798													0	0	0	0	0	0	0	20	0	0	0	875
filtered out because best identity < 1	only in BLANK not in samples	85	Huperzia	Embryophyta	[Huperzia varia]	[]	37428	3193	0.857143	0.538462	90													0	0	0	0	0	0	0	0	0	0	0	85
filtered out because best identity < 1	only in BLANK not in samples	83	Embryophyta	Eukaryota	[]	[]	3193	2759	0.625	0.5	83													0	0	0	0	0	0	0	0	0	0	0	83
filtered out because best identity < 1	only in BLANK not in samples	63	Streptophyta	Eukaryota	[]	[]	35493	2759	0.666667	0.5	64													0	0	0	0	0	0	0	0	0	0	0	17
filtered out because best identity < 1	only in BLANK not in samples	21	Eukaryota	Eukaryota	[]	[]	2759	2759	0.526316	0.5	21													0	0	0	0	0	0	0	0	0	0	0	21
filtered out because best identity < 1	in 2 samples	3773	Embryophyta	Eukaryota	[]	[]	3193	2759	0.625	0.5	3786													0	0	0	0	0	0	0	19	0	12	0	975
filtered out because best identity < 1	only in BLANK not in samples	384	Embryophyta	Embryophyta	[]	[]	3193	3193	0.714286	0.5	384													0	0	0	0	0	0	0	0	0	0	0	384
filtered out because best identity < 1	only in BLANK not in samples	75	Embryophyta	Eukaryota	[Huperzia varia]	[]	3193	2759	0.833333	0.461538	77													0	0	0	0	0	0	0	0	0	0	0	12
filtered out because best identity < 1	only in BLANK not in samples	672	Streptophyta	Embryophyta	[]	[]	35493	3193	0.6	0.461538	672													0	0	0	0	0	0	0	0	0	0	0	672
BLANK.EH146_trnL_g_h																																				sample.EH135_trnL_g_h	sample.EH136_trnL_g_h	sample.EH137_trnL_g_h	sample.EH138_trnL_g_h	sample.EH139_trnL_g_h	sample.EH140_trnL_g_h	sample.EH141_trnL_g_h	sample.EH142_trnL_g_h	sample.EH143_trnL_g_h	sample.EH144_trnL_g_h	sample.EH145_trnL_g_h	BLANK.EH146_trnL_g_h
filtered out as food / cultivated plant	in 1 sample	527	Lactuca sativa	Asteraceae	[Lactuca sativa]	[]	4236	4210	1	0.98	529																									0	360	0	0	0	0	0	0	0	0	0	167
filtered out because best identity < 1	only in BLANK not in samples	31	Streptophyta	Embryophyta	[]	[]	35493	3193	0.642857	0.6	31																									0	0	0	0	0	0	0	0	0	0	0	31
filtered out because best identity < 1	only in BLANK not in samples	16	Magnoliophyta	Magnoliophyta	[]	[]	3398	3398	0.614754	0.547009	16																									0	0	0	0	0	0	0	0	0	0	0	13
filtered out because best identity < 1	only in BLANK not in samples	13	Embryophyta	Eukaryota	[Huperzia varia, Herbertus sendtneri, Nipponolejeunea subalpina, Nipponolejeunea pilifera]	[]	3193	2759	0.583333	0.529412	13																									0	0	0	0	0	0	0	0	0	0	0	13
filtered out because best identity < 1	only in BLANK not in samples	13	Streptophyta	Eukaryota	[]	[]	35493	2759	0.625	0.5	13																									0	0	0	0	0	0	0	0	0	0	0	13
filtered out because best identity < 1	only in BLANK not in samples	14	Embryophyta	Eukaryota	[Huperzia varia]	[]	3193	2759	0.833333	0.5	14																									0	0	0	0	0	0	0	0	0	0	0	14
filtered out because best identity < 1	only in BLANK not in samples	24	Eukaryota	Eukaryota	[]	[]	2759	2759	0.5	0.5	24																									0	0	0	0	0	0	0	0	0	0	0	24
filtered out because best identity < 1	only in BLANK not in samples	49	Eukaryota	Eukaryota	[Tilletiopsis sp. CBS 111593, Ustilago cynodontis, Huperzia funiformis]	[]	2759	2759	0.55	0.5	49																									0	0	0	0	0	0	0	0	0	0	0	49
filtered out because best identity < 1	only in BLANK not in samples	11	Eukaryota	Eukaryota	[]	[]	2759	2759	0.535714	0.481481	11																									0	0	0	0	0	0	0	0	0	0	0	11
BLANK.EH158_trnL_g_h																																																sample.EH147_trnL_g_h	sample.EH148_trnL_g_h
filtered out as food / cultivated plant	in 6 samples	65890	Pooideae	Triticeae	[]	[]	147368	147389	1	1	66015																																					11	139
filtered out as putative contamination	only in BLANK not in samples	191791	Pinus	Pinus	[Pinus resinosa]	[Pinus pumila, Pinus sylvestris]	139271	3337	0.977778	1	191796																																					0	0
filtered out because best identity < 1	only in BLANK not in samples	243	Pinus	Pinus	[Pinus resinosa]	[Pinus pumila, Pinus sylvestris]	139271	3337	0.955556	0.977778	250																																					0	0
filtered out because best identity < 1	only in BLANK not in samples	907	Pinus	Pinus	[Pinus resinosa]	[Pinus pumila, Pinus sylvestris]	139271	3337	0.955556	0.977778	910																																					0	0
filtered out because best identity < 1	only in BLANK not in samples	17965	Pinus resinosa	Pinus	[Pinus resinosa]	[Pinus pumila, Pinus sylvestris]	54921	3337	0.977778	0.977778	17967																																					0	0
filtered out because best identity < 1	only in BLANK not in samples	75	Pinus	Pinus	[Pinus resinosa]	[Pinus pumila, Pinus sylvestris]	139271	3337	0.933333	0.955556	76																																					0	0
filtered out because best identity < 1	only in BLANK not in samples	18	Poeae	Pooideae	[Poa infirma]	[]	147387	147368	0.981132	0.981132	24																																					0	0
filtered out because best identity < 1	only in BLANK not in samples	91	Poeae	Pooideae	[]	[]	147387	147368	0.981132	0.981132	119																																					0	0
filtered out because best identity < 1	only in BLANK not in samples	13	Poeae	Pooideae	[Poa compressa]	[]	147387	147368	0.981132	0.980769	15																																					0	0
filtered out because best identity < 1	only in BLANK not in samples	13	BEP clade	Pooideae	[Phalaris truncata, Elymus repens, Aira praecox, Festuca scariosa]	[]	359160	147368	0.980769	0.980769	15																																					0	0
filtered out because best identity < 1	only in BLANK not in samples	11	BEP clade	Pooideae	[Phalaris truncata, Elymus repens, Aira praecox, Festuca scariosa]	[]	359160	147368	0.980769	0.980769	14																																					0	0
filtered out because best identity < 1	only in BLANK not in samples	12	BEP clade	Pooideae	[Phalaris truncata, Elymus repens, Aira praecox, Festuca scariosa]	[]	359160	147368	0.980769	0.980769	20																																					0	0
filtered out because best identity < 1	only in BLANK not in samples	70	Pooideae	Pooideae	[Aira praecox]	[]	147368	147368	0.981132	0.980769	117																																					0	0
filtered out because best identity < 1	only in BLANK not in samples	13	BEP clade	Pooideae	[Phalaris truncata, Elymus repens, Aira praecox, Festuca scariosa]	[]	359160	147368	0.980769	0.980769	14																																					0	0
filtered out because best identity < 1	only in BLANK not in samples	78	BEP clade	Pooideae	[Phalaris truncata, Elymus repens, Aira praecox, Festuca scariosa]	[]	359160	147368	0.980769	0.980769	79																																					0	0
filtered out because best identity < 1	only in BLANK not in samples	12	BEP clade	Pooideae	[Phalaris truncata, Elymus repens, Aira praecox, Festuca scariosa]	[]	359160	147368	0.980769	0.980769	18																																					0	0
filtered out because best identity < 1	only in BLANK not in samples	13	BEP clade	Pooideae	[Phalaris truncata, Elymus repens, Aira praecox, Festuca scariosa]	[]	359160	147368	0.980769	0.980769	14																																					0	0
filtered out because best identity < 1	only in BLANK not in samples	843	BEP clade	Pooideae	[Phalaris truncata, Elymus repens, Aira praecox]	[]	359160	147368	0.980769	0.980769	843																																					0	0
filtered out because best identity < 1	only in BLANK not in samples	18	BEP clade	Pooideae	[Phalaris truncata, Elymus repens, Aira praecox, Festuca scariosa]	[]	359160	147368	0.980769	0.980769	19																																					0	0
filtered out because best identity < 1	only in BLANK not in samples	60	BEP clade	Pooideae	[Phalaris truncata, Elymus repens, Aira praecox, Festuca scariosa]	[]	359160	147368	0.980769	0.980769	61																																					0	0
filtered out because best identity < 1	only in BLANK not in samples	276	Poaceae	Magnoliophyta	[]	[]	4479	3398	0.961538	0.961538	287																																					0	0
filtered out because best identity < 1	only in BLANK not in samples	28	Poaceae	Magnoliophyta	[]	[]	4479	3398	0.942308	0.942308	28																																					0	0
filtered out as food / cultivated plant	only in BLANK not in samples	61574	Acacia auriculiformis	Magnoliophyta	[Acacia auriculiformis]	[]	205027	3398	1	0.836066	61574																																					0	0
filtered out because best identity < 1	only in BLANK not in samples	14	Mimosoideae	Magnoliophyta	[Acacia auriculiformis]	[]	3807	3398	0.966102	0.803279	14																																					0	0
filtered out because best identity < 1	only in BLANK not in samples	81	Spermatophyta	Spermatophyta	[]	[]	58024	58024	0.608696	0.583333	81																																					0	0
filtered out because best identity < 1	only in BLANK not in samples	17	Eukaryota	Spermatophyta	[]	[]	2759	58024	0.576923	0.559322	17																																					0	0
filtered out because best identity < 1	only in BLANK not in samples	23	Euphyllophyta	Euphyllophyta	[]	[]	78536	78536	0.583333	0.555556	23																																					0	0
filtered out because best identity < 1	only in BLANK not in samples	51	Euphyllophyta	Spermatophyta	[]	[]	78536	58024	0.568627	0.55	51																																					0	0
filtered out because best identity < 1	only in BLANK not in samples	15	Embryophyta	Euphyllophyta	[]	[]	3193	78536	0.571429	0.545455	15																																					0	0
filtered out because best identity < 1	only in BLANK not in samples	19	Streptophyta	Spermatophyta	[]	[]	35493	58024	0.571429	0.540984	19																																					0	0
filtered out because best identity < 1	only in BLANK not in samples	13	Euphyllophyta	Spermatophyta	[]	[]	78536	58024	0.568627	0.540984	13																																					0	0
filtered out because best identity < 1	only in BLANK not in samples	25	Euphyllophyta	Spermatophyta	[]	[]	78536	58024	0.568627	0.540984	25																																					0	0
filtered out because best identity < 1	only in BLANK not in samples	122	Embryophyta	Euphyllophyta	[]	[]	3193	78536	0.561404	0.535714	122																																					0	0
filtered out because best identity < 1	only in BLANK not in samples	10	Euphyllophyta	Spermatophyta	[]	[]	78536	58024	0.557692	0.532258	10																																					0	0
filtered out because best identity < 1	only in BLANK not in samples	70498	Viridiplantae	Eukaryota	[]	[]	33090	2759	0.541667	0.454545	70498																																					0	0
BLANK.EH169_trnL_g_h
	clean
[truncated: 30 more columns]
