# Supplementary material for: Sedimentary ancient DNA and pollen reveal the composition of plant organic matter in Late Quaternary permafrost sediments of the Buor Khaya Peninsula (north-eastern Siberia)
Source: Copernicus journal article supplement (doi:10.5194/bg-14-575-2017), 2017-02-07
Supplement: Supplementary file 3 [file S5_DNA_dataset.xlsx]

## Sheet: terrestrial_dataset
Sequence counts (best identity =1) corresponding to 113 terrestrial trnL P6 loop plant MOTUs derived from 54 sediment samples along the BK-8 permafrost core. The data are deposited at https://doi.org/10.1594/PANGAEA.870897.
											depth (m)	0.1	0.35	0.55	0.85	1.1	1.2	1.3	1.6	1.8	1.9	2.1	2.4	2.6	2.85	3.3	8.35	8.75	8.9	8.95	9	9.15	9.6	9.7	9.9	10.15	10.3	10.4	10.65	10.72	10.9	11.4	11.7	11.85	12.12	12.25	12.45	12.95	13.1
final name	comment	new_counts	scientific_name_by_db.gh_embl117	scientific_name_by_db.arctborbryo_gh	taxid_by_db.gh_embl117	species_list.gh_embl117	taxid_by_db.arctborbryo_gh	species_list.arctborbryo_gh	best_identity.gh_embl117	best_identity.arctborbryo_gh	family_name	EH111	EH119	EH121	EH112	EH113	EH114	EH115	EH116	EH117	EH118	EH133	EH120	EH123	EH124	EH125	EH126	EH127	EH128	EH129	EH130	EH131	EH132	EH135	EH136	EH137	EH138	EH139	EH140	EH141	EH142	EH143	EH144	EH145	EH147	EH148	EH149	EH150	EH151
Aconogonon		192	Aconogonon	Aconogonon	106214	[]	106214	[Aconogonon alaskanum, Aconogonon ocreatum, Aconogonon tripterocarpum]	1	1	Polygonaceae	0	0	0	0	0	0	0	0	0	0	0	0	0	0	0	21	0	11	0	10	0	0	0	0	0	0	0	0	0	46	43	0	0	61	0	0	0	0
Agrostidinae MOTU1		219218	Poeae	Agrostidinae	147387	[]	640621	[]	1	1	Poaceae	63305	540	250	4847	19461	88	0	0	119096	0	0	0	91	9999	0	166	23	0	0	0	0	0	0	0	0	0	517	0	0	0	0	0	0	53	0	0	36	18
Agrostidinae MOTU2		1709	Poeae	Agrostidinae	147387	[]	640621	[]	1	0.982759	Poaceae	81	0	0	56	678	0	0	0	83	0	0	0	0	786	0	14	0	0	0	0	0	0	0	0	0	0	0	0	0	0	0	0	0	0	0	0	0	0
Alnus	not used for statistical analyses (in < 6 samples)	563	Alnus	Alnus	3515	[]	3515	[Alnus incana, Alnus hirsuta]	1	1	Betulaceae	0	0	563	0	0	0	0	0	0	0	0	0	0	0	0	0	0	0	0	0	0	0	0	0	0	0	0	0	0	0	0	0	0	0	0	0	0	0
Alyssum obovatum	not used for statistical analyses (in < 6 samples)	22	Alyssum obovatum	Alyssum obovatum	457772	[Alyssum obovatum]	457772	[Alyssum obovatum]	1	1	Brassicaceae	0	0	0	0	0	0	0	0	0	0	0	0	0	0	0	0	0	0	0	0	0	0	0	0	0	22	0	0	0	0	0	0	0	0	0	0	0	0
Androsace chamaejasme		304	Androsace chamaejasme	Androsace chamaejasme	175028	[Androsace chamaejasme]	175028	[Androsace chamaejasme]	1	1	Primulaceae	0	0	0	0	0	0	0	0	0	0	0	0	0	0	0	0	0	0	61	21	0	0	0	0	0	34	30	0	72	68	18	0	0	0	0	0	0	0
Anemone patens		5366	Ranunculaceae	Anemone patens	3440	[]	387931	[Anemone patens]	1	1	Ranunculaceae	0	0	0	0	0	0	0	0	0	0	0	0	0	0	0	31	112	0	0	24	232	0	0	0	0	16	34	0	0	2359	2158	43	180	89	21	24	0	0
Anthemideae MOTU1		99428	Asteroideae	Anthemideae	102804	[]	102810	[]	1	1	Asteraceae	0	0	0	0	0	0	546	0	0	0	0	0	56	0	21363	944	2623	6654	2159	814	7499	4387	10859	0	349	2043	9006	1570	1187	6253	5076	222	568	2680	4828	2303	2251	1614
Anthemideae MOTU2		196	Anthemideae	Anthemideae	102810	[]	102810	[Tanacetum bipinnatum, Artemisia campestris]	1	1	Asteraceae	0	0	0	0	0	0	0	0	0	0	0	0	0	0	34	0	13	10	12	0	18	0	43	0	0	0	16	0	0	23	15	0	0	0	12	0	0	0
Apiaceae MOTU1	not used for statistical analyses (in < 6 samples)	43	Apiaceae	Apiaceae	4037	[]	4037	[Heracleum dissectum, Heracleum sphondylium, Angelica decurrens, Angelica gmelinii, Angelica archangelica, Heracleum maximum, Angelica atropurpurea, Conioselinum tataricum, Podistera macounii]	1	1	Apiaceae	0	0	0	0	20	0	0	0	23	0	0	0	0	0	0	0	0	0	0	0	0	0	0	0	0	0	0	0	0	0	0	0	0	0	0	0	0	0
Apiaceae MOUT2	not used for statistical analyses (in < 6 samples)	121	Apiaceae	Apiaceae	4037	[]	4037	[Phlojodicarpus sibiricus, Phlojodicarpus villosus, Pachypleurum alpinum, Heracleum sphondylium, Cnidium dubium, Seseli libanotis]	1	1	Apiaceae	0	0	0	0	0	0	0	0	0	0	0	0	0	0	0	0	0	0	0	10	0	0	0	0	0	0	16	0	0	82	13	0	0	0	0	0	0	0
Armeria scabra	not used for statistical analyses (in < 6 samples)	203	Armeria	Armeria scabra	63086	[]	395279	[Armeria scabra]	1	1	Plumbaginaceae	0	0	0	0	0	0	0	0	0	0	0	0	0	0	0	0	0	0	0	0	0	0	0	0	0	0	0	0	0	0	0	0	0	0	144	59	0	0
Asteraceae MOTU1		4755	Asteraceae	Asteraceae	4210	[]	4210	[]	1	1	Asteraceae	0	0	0	0	0	0	0	1390	0	0	0	0	126	0	21	0	77	0	57	37	0	1279	0	0	0	0	0	0	473	930	112	0	38	24	98	68	0	0
Asteraceae MOTU2		182	Asterales	Asteraceae	4209	[Atractylodes lancea, Trichocoryne connata, Delilia biflora, Cosmos bipinnatus, Ageratina adenophora, Tragopogon pratensis, Gerbera sp. Liu 2282, Dampiera wellsiana]	4210	[Hieracium sp. LG-2009, Mulgedium pulchellum, Mulgedium sibiricum, Hieracium caespitosum, Saussurea alpina, Lactuca tatarica, Lactuca sibirica, Sonchus arvensis, Taraxacum croceum, Hieracium alpinum, Taraxacum lacerum, Hypochaeris maculata, Saussurea tilesii]	0.980392	1	NA	0	0	0	0	0	0	0	0	0	0	0	0	0	0	0	0	0	0	11	0	96	0	0	0	0	0	0	0	0	0	0	0	20	0	0	13	0	0
Asteraceae MOTU3	not used for statistical analyses (in < 6 samples)	10	Asteraceae	Asterales	4210	[]	4209	[]	1	0.98	Asteraceae	0	0	0	0	0	0	0	0	0	0	0	0	0	0	0	0	0	0	0	0	0	10	0	0	0	0	0	0	0	0	0	0	0	0	0	0	0	0
Asteroideae MOTU1		762	Astereae	Asteroideae	102809	[]	102804	[]	1	1	Asteraceae	0	0	0	0	0	0	0	0	0	0	0	0	0	0	0	0	0	0	0	0	31	0	0	0	0	145	394	0	0	0	0	0	0	0	0	0	0	0
Asteroideae MOTU2	not used for statistical analyses (in < 6 samples)	357	Asteroideae	Asteroideae	102804	[]	102804	[Arnica angustifolia, Bidens radiata, Arnica chamissonis, Arnica griscomii, Artemisia gmelinii, Arnica lessingii, Arnica lonchophylla]	1	0.980769	Asteraceae	0	0	0	0	0	0	0	0	0	0	0	0	0	0	0	0	0	0	0	0	0	0	0	0	0	0	0	357	0	0	0	0	0	0	0	0	0	0
Astragalus MOTU1	Astragalus_Group1	1376	Astragalus	Astragalus	20400	[]	20400	[Astragalus umbellatus, Astragalus alpinus]	1	1	Fabaceae	0	0	401	121	0	0	0	0	0	0	0	0	0	0	0	66	33	0	57	0	0	0	0	0	482	106	0	0	0	0	0	0	0	0	18	19	0	0
Astragalus MOTU2	Astragalus_Group2	1104	Astragalus	Astragalus	20400	[]	20400	[Astragalus sealei, Astragalus tolmaczevii, Astragalus vallicola]	1	1	Fabaceae	0	0	0	0	0	0	0	0	0	0	0	0	0	0	0	0	16	318	175	0	0	0	0	0	0	19	0	0	0	319	39	14	0	0	37	47	0	0
Betula		176810	Betulaceae	Betula	3514	[]	3504	[]	1	1	Betulaceae	0	43976	43068	26399	8065	13484	0	0	0	576	1055	48	1410	37864	865	0	0	0	0	0	0	0	0	0	0	0	0	0	0	0	0	0	0	0	0	0	0	0
Bistorta	not used for statistical analyses (in < 6 samples)	16	Bistorta	Bistorta	137670	[]	137670	[Bistorta elliptica, Bistorta plumosa]	1	1	Polygonaceae	0	0	0	0	0	0	0	0	0	0	0	0	0	0	0	0	0	0	0	16	0	0	0	0	0	0	0	0	0	0	0	0	0	0	0	0	0	0
Bistorta vivipara		6634	Polygonoideae	Bistorta vivipara	1110380	[]	371026	[Bistorta vivipara]	1	1	Polygonaceae	0	0	0	0	0	0	0	0	0	0	0	0	0	0	0	1881	177	132	246	169	47	0	0	0	31	0	36	0	0	160	92	171	16	280	22	0	1198	18
Bromus ciliatus		705	Bromus	Bromus ciliatus	4501	[]	254123	[Bromus ciliatus]	1	1	Poaceae	0	0	0	0	0	0	16	0	0	0	0	0	56	0	24	0	0	0	0	0	48	411	0	0	0	0	0	0	0	21	12	0	0	85	15	17	0	0
Bromus pumpellianus		10595	Bromus	Bromus pumpellianus	4501	[]	254148	[Bromus pumpellianus]	1	1	Poaceae	0	0	0	0	0	0	1938	0	0	0	0	0	2240	0	2078	0	283	348	35	111	366	548	0	0	0	158	230	0	68	1119	178	0	46	200	558	76	0	0
Calamagrostis	not used for statistical analyses (in < 6 samples)	126	Calamagrostis	Calamagrostis	15376	[]	15376	[Calamagrostis epigeios, Calamagrostis arundinacea]	1	1	Poaceae	91	0	0	0	0	0	0	0	35	0	0	0	0	0	0	0	0	0	0	0	0	0	0	0	0	0	0	0	0	0	0	0	0	0	0	0	0	0
Caryophyllaceae	not used for statistical analyses (in < 6 samples)	35	Caryophyllaceae	Eremogone capillaris	3568	[]	669626	[Eremogone capillaris]	1	0.973684	Caryophyllaceae	0	0	0	0	0	0	0	0	0	0	0	0	0	0	0	0	0	35	0	0	0	0	0	0	0	0	0	0	0	0	0	0	0	0	0	0	0	0
Castilleja pallida var. hyparctica	not used for statistical analyses (in < 6 samples)	56	Lamiales	Castilleja pallida var. hyparctica	4143	[Euthystachys abbreviata]	669653	[Castilleja pallida]	0.979167	1	NA	0	0	0	0	0	0	0	0	0	0	0	0	0	0	0	0	0	0	0	0	0	0	0	0	0	0	56	0	0	0	0	0	0	0	0	0	0	0
Castilleja septentrionalis	not used for statistical analyses (in < 6 samples)	22	Lamiales	Castilleja septentrionalis	4143	[Nelsonia campestris, Cycnium tubulosum, Castilleja vadosa, Nelsonia sp. Harris 5722]	10005790	[Castilleja septentrionalis]	0.977273	1	NA	0	0	0	0	0	0	0	0	0	0	0	0	0	0	0	0	0	0	22	0	0	0	0	0	0	0	0	0	0	0	0	0	0	0	0	0	0	0
Castilleja MOTU1		2553	Lamiales	Castilleja	4143	[Salvia nilotica, Castilleja linariifolia, Castilleja angustifolia]	46036	[Castilleja elegans, Castilleja rubra, Castilleja pallida]	0.978261	1	NA	0	0	0	0	0	0	0	0	0	0	0	0	0	0	0	0	33	552	1887	27	24	0	0	0	0	0	0	0	0	0	0	0	0	0	0	18	0	0
Castilleja MOTU2	not used for statistical analyses (in < 6 samples)	571	Lamiales	Castilleja	4143	[Micrargeria filiformis, Castilleja angustifolia]	46036	[Castilleja hyperborea, Castilleja elegans, Castilleja raupii]	0.977778	1	NA	0	0	0	0	0	0	0	0	0	0	0	0	0	0	0	0	0	188	383	0	0	0	0	0	0	0	0	0	0	0	0	0	0	0	0	0	0	0
Castilleja MOTU3	not used for statistical analyses (in < 6 samples)	241	Lamiales	Castilleja	4143	[Castilleja angustifolia, Jovellana violacea, Castilleja linariifolia]	46036	[Castilleja caudata, Castilleja pallida, Castilleja septentrionalis]	0.978723	1	NA	0	0	0	0	0	0	0	0	0	0	0	0	0	0	0	18	90	31	81	0	0	0	0	0	0	0	21	0	0	0	0	0	0	0	0	0	0	0
Cerastium		363	Caryophyllaceae	Cerastium	3568	[]	3579	[Cerastium arcticum, Cerastium alpinum, Cerastium arvense, Cerastium regelii, Cerastium gorodkovianum, Cerastium beeringianum]	1	1	Caryophyllaceae	0	0	0	0	0	0	0	0	0	0	0	0	0	0	0	117	0	0	0	0	38	0	0	0	0	0	0	0	0	0	0	0	0	129	47	14	18	0
Cerastium maximum	not used for statistical analyses (in < 6 samples)	384	Cerastium maximum	Cerastium maximum	669654	[Cerastium maximum]	669654	[Cerastium maximum]	1	1	Caryophyllaceae	0	0	0	0	0	0	250	0	0	0	0	0	0	0	0	0	0	0	0	0	0	0	0	0	0	11	0	0	0	0	109	0	0	14	0	0	0	0
Chrysosplenium	not used for statistical analyses (in < 6 samples)	13	Chrysosplenium	Chrysosplenium	23242	[]	23242	[Chrysosplenium tetrandrum, Chrysosplenium wrightii, Chrysosplenium alternifolium]	1	1	Saxifragaceae	0	0	0	0	0	0	0	0	0	0	0	0	0	0	0	13	0	0	0	0	0	0	0	0	0	0	0	0	0	0	0	0	0	0	0	0	0	0
Crepidinae	not used for statistical analyses (in < 6 samples)	24	Asteraceae	Crepidinae	4210	[]	745067	[Lapsana communis, Crepis chrysantha, Crepis sibirica, Crepis tectorum]	1	1	Asteraceae	0	0	0	0	0	0	0	0	0	0	0	0	0	0	0	0	0	0	0	0	0	0	0	0	0	0	0	0	0	0	0	0	14	0	10	0	0	0
Crucihimalaya bursifolia	not used for statistical analyses (in < 6 samples)	10	Brassicaceae	Transberingia bursifolia	3700	[]	97978	[Transberingia bursifolia]	1	1	Brassicaceae	0	0	0	0	0	0	0	0	0	0	0	0	0	0	0	0	0	0	0	0	0	0	0	0	0	10	0	0	0	0	0	0	0	0	0	0	0	0
Delphinium	not used for statistical analyses (in < 6 samples)	119422	Delphinium	Delphinium	46246	[]	46246	[Delphinium brachycentrum, Delphinium middendorffii]	1	1	Ranunculaceae	0	0	0	2260	116951	0	0	0	0	0	0	0	0	0	0	0	0	0	0	0	0	0	0	0	0	0	40	0	0	0	120	0	0	51	0	0	0	0
Dianthus	not used for statistical analyses (in < 6 samples)	56	Caryophyllaceae	Dianthus	3568	[]	3569	[Dianthus deltoides, Dianthus arenarius, Dianthus superbus, Dianthus repens]	1	1	Caryophyllaceae	0	0	0	0	0	0	0	0	0	0	0	0	0	0	0	0	0	56	0	0	0	0	0	0	0	0	0	0	0	0	0	0	0	0	0	0	0	0
Draba MOTU1	not used for statistical analyses (in < 6 samples); Draba_Group2	93	Draba	Draba	87301	[]	87301	[Draba pilosa, Draba glacialis, Draba cinerea, Draba oblongata, Draba arctica]	1	1	Brassicaceae	0	0	0	0	0	0	0	0	0	0	0	0	0	0	0	41	0	0	20	0	0	0	0	0	0	0	0	0	0	0	0	0	0	14	18	0	0	0
Draba MOTU2	not used for statistical analyses (in < 6 samples); Draba_Group1	74	Arabideae	Draba	981070	[]	87301	[]	1	1	Brassicaceae	0	0	0	0	0	0	0	0	0	0	0	0	0	0	0	0	0	0	0	74	0	0	0	0	0	0	0	0	0	0	0	0	0	0	0	0	0	0
Dryas		130012	Dryadoideae	Dryas	721791	[]	48230	[Dryas ajanensis, Dryas grandis, Dryas punctata, Dryas drummondii, Dryas integrifolia, Dryas octopetala, Dryas incisa]	1	1	Rosaceae	0	76	466	4192	15035	0	0	0	0	0	0	0	0	0	0	1159	2086	3847	6980	4354	26714	723	0	0	896	1399	2334	163	1080	6974	1090	264	742	400	1195	129	1326	112
Epilobium	not used for statistical analyses (in < 6 samples)	636	Onagraceae	Epilobium	3934	[]	13054	[Epilobium collinum, Epilobium montanum, Epilobium ciliatum, Epilobium davuricum, Epilobium hornemannii, Epilobium lactiflorum, Epilobium palustre, Epilobium leptophyllum]	1	1	Onagraceae	0	0	0	0	0	0	0	0	0	0	0	0	0	0	0	0	0	0	0	0	0	0	0	0	0	0	0	0	0	0	0	0	0	0	0	0	0	0
Epilobium angustifolium	not used for statistical analyses (in < 6 samples)	7678	Chamerion angustifolium	Chamerion angustifolium	13055	[Chamerion angustifolium]	13055	[Chamerion angustifolium]	1	1	Onagraceae	0	0	53	2448	0	3653	0	0	0	0	0	0	388	1136	0	0	0	0	0	0	0	0	0	0	0	0	0	0	0	0	0	0	0	0	0	0	0	0
Eremogone capillaris	not used for statistical analyses (in < 6 samples)	14	Eremogone capillaris	Eremogone capillaris	669626	[Eremogone capillaris]	669626	[Eremogone capillaris]	1	1	Caryophyllaceae	0	0	0	0	0	0	0	0	0	0	0	0	0	0	0	0	0	14	0	0	0	0	0	0	0	0	0	0	0	0	0	0	0	0	0	0	0	0
Eritrichium		1325	Boraginaceae	Eritrichium	21571	[]	184081	[Eritrichium aretioides, Eritrichium splendens, Eritrichium villosum, Eritrichium sericeum]	1	1	Boraginaceae	0	0	0	0	0	0	0	0	0	0	0	0	0	0	0	0	108	65	298	20	69	0	0	0	0	34	226	0	19	247	29	0	16	0	68	11	0	0
Festuca MOTU1	Festuca_Group1	52980	Festuca	Festuca	4605	[]	4605	[Festuca viviparoidea, Festuca kolymensis]	1	1	Poaceae	0	0	0	0	0	0	0	0	0	0	0	0	0	0	0	0	150	462	258	13	191	2301	0	0	0	0	343	442	0	1299	769	228	40	37647	1142	4594	2526	196
Festuca MOTU2	Festuca_Group2	31816	Poeae	Festuca	147387	[]	4605	[Festuca lenensis, Festuca baffinensis, Festuca brevissima, Festuca altissima, Festuca gigantea, Festuca saximontana, Festuca edlundiae, Festuca rubra, Festuca hyperborea, Festuca brachyphylla, Festuca ovina, Festuca kolymensis]	1	1	Poaceae	0	0	0	0	20	13	33	0	0	0	66	66	17	78	4775	3781	227	568	90	80	402	147	0	0	11	108	668	13	0	193	228	1481	40	8516	357	1644	4209	112
Gentianella	not used for statistical analyses (in < 6 samples)	15	Gentianella	Gentianella	49959	[]	49959	[Gentianella propinqua, Gentianella amarella]	1	1	Gentianaceae	0	0	0	0	0	0	0	0	0	0	0	0	0	0	0	0	0	0	0	15	0	0	0	0	0	0	0	0	0	0	0	0	0	0	0	0	0	0
Gentianopsis	not used for statistical analyses (in < 6 samples)	109	Gentianopsis	Gentianopsis	50798	[]	50798	[Gentianopsis barbata, Gentianopsis detonsa]	1	1	Gentianaceae	0	0	0	0	0	0	0	0	0	0	0	0	0	0	0	0	0	0	0	0	0	0	0	0	0	0	0	0	0	109	0	0	0	0	0	0	0	0
Geum	not used for statistical analyses (in < 6 samples)	92	Colurieae	Geum	721790	[]	3761	[Geum rivale, Geum macrophyllum, Geum glaciale, Geum aleppicum, Geum rossii, Geum urbanum]	1	1	Rosaceae	0	0	0	0	0	0	0	0	0	0	0	0	0	0	0	0	0	32	34	0	0	0	0	0	0	0	0	0	0	0	0	0	0	26	0	0	0	0
Glyceria	not used for statistical analyses (in < 6 samples)	52	Glyceria	Glyceria	37871	[]	37871	[Glyceria notata, Glyceria borealis, Glyceria fluitans, Glyceria striata, Glyceria lithuanica]	1	1	Poaceae	0	0	0	0	0	0	0	0	0	0	0	0	0	0	0	0	0	10	0	0	0	14	0	0	0	0	0	12	0	16	0	0	0	0	0	0	0	0
Hedysarum hedysaroides subsp. arcticum	not used for statistical analyses (in < 6 samples)	591	Hedysarum hedysaroides	Hedysarum hedysaroides subsp. arcticum	669703	[Hedysarum hedysaroides]	10005752	[Hedysarum hedysaroides]	0.982456	1	Fabaceae	0	0	0	0	0	0	0	0	0	0	0	0	59	0	0	20	51	37	18	0	138	0	0	0	0	36	0	0	0	108	0	0	15	0	17	0	0	0
Helictotrichon hookeri	not used for statistical analyses (in < 6 samples)	416	Helictotrichon	Helictotrichon hookeri	49767	[]	320632	[Helictotrichon hookeri]	1	1	Poaceae	0	0	0	0	0	0	0	0	0	0	0	0	24	349	0	0	0	0	0	0	0	0	0	0	0	0	0	0	0	0	0	0	0	13	0	0	30	0
Hulteniella integrifolia		2988	Asteroideae	Hulteniella integrifolia	102804	[]	669707	[Hulteniella integrifolia]	1	1	Asteraceae	0	0	0	0	0	0	14	0	0	0	0	0	0	0	544	25	69	198	77	19	254	228	444	0	16	58	264	45	50	221	148	0	16	48	128	56	29	23
Kobresia		1608	Cariceae	Kobresia	986155	[]	46330	[Kobresia myosuroides, Kobresia sibirica]	1	1	Cyperaceae	0	0	0	0	0	0	0	0	0	0	0	0	0	0	0	0	69	0	0	0	0	0	0	0	0	96	10	0	0	0	199	0	17	0	1155	50	0	0
Lagotis glauca	not used for statistical analyses (in < 6 samples)	135	Lagotis	Lagotis glauca	165307	[]	669716	[Lagotis glauca]	1	1	Plantaginaceae	0	0	0	0	0	0	0	0	0	0	0	0	0	0	0	0	0	0	31	0	0	0	0	0	0	0	0	0	0	94	0	0	0	0	0	0	0	0
Myosotis alpestris		7920	Myosotis	Myosotis alpestris	192333	[]	192337	[Myosotis alpestris]	1	1	Boraginaceae	0	0	0	481	0	0	67	0	0	0	0	0	0	0	0	101	354	455	125	199	196	0	0	0	502	86	58	323	67	248	414	798	100	1980	73	248	266	0
Noccaea arctica	not used for statistical analyses (in < 6 samples)	81	Brassicaceae	Noccaea arctica	3700	[]	669729	[Noccaea arctica]	1	1	Brassicaceae	0	0	0	0	0	0	0	0	0	0	0	0	0	0	0	0	0	0	26	0	31	0	0	0	0	0	0	0	0	0	0	0	0	0	12	0	12	0
Oxytropis		5198	Oxytropis	Oxytropis	20802	[]	20802	[Oxytropis campestris, Oxytropis jordalii, Oxytropis leucantha, Oxytropis mertensiana, Oxytropis middendorffii, Oxytropis sordida, Oxytropis varians, Oxytropis arctica, Oxytropis gorodkovii, Oxytropis bryophila, Oxytropis scheludjakoviae, Oxytropis borealis, Oxytropis maydelliana]	1	1	Fabaceae	0	21	0	0	0	0	0	0	0	0	0	0	0	0	3107	0	336	0	199	0	435	0	0	0	0	0	477	0	22	0	145	0	0	0	373	32	0	41
Oxytropis deflexa	not used for statistical analyses (in < 6 samples)	26	Oxytropis	Oxytropis deflexa	20802	[]	20804	[Oxytropis deflexa]	1	1	Fabaceae	0	0	0	0	0	0	0	0	0	0	0	0	0	0	0	0	10	0	0	0	0	0	0	0	0	0	0	0	0	0	0	0	0	0	16	0	0	0
Parrya MOTU1		112730	Brassicaceae	Parrya	3700	[]	281479	[Parrya arctica, Parrya nudicaulis]	1	1	Brassicaceae	0	0	0	782	39919	23966	9262	97	0	9793	0	2143	24787	0	0	0	50	0	253	37	161	0	0	0	609	42	148	187	47	0	0	0	0	0	12	0	144	18
Parrya MOTU2	not used for statistical analyses (in < 6 samples); damage?	26	Diptychocarpus strictus	Parrya	359840	[Diptychocarpus strictus]	281479	[Parrya arctica, Parrya nudicaulis]	1	0.978723	Brassicaceae	0	0	0	0	13	0	0	0	0	0	0	0	13	0	0	0	0	0	0	0	0	0	0	0	0	0	0	0	0	0	0	0	0	0	0	0	0	0
Pedicularis capitata	not used for statistical analyses (in < 6 samples)	28	Pedicularis	Pedicularis capitata	43174	[]	669764	[Pedicularis capitata]	1	1	Orobanchaceae	0	0	0	0	0	0	0	0	0	0	0	0	28	0	0	0	0	0	0	0	0	0	0	0	0	0	0	0	0	0	0	0	0	0	0	0	0	0
Pedicularis pacifica		378	Pedicularis pacifica	Pedicularis pacifica	669772	[Pedicularis pacifica]	669772	[Pedicularis pacifica]	1	1	Orobanchaceae	0	0	0	0	0	0	0	0	0	0	0	0	0	0	0	0	64	0	0	70	0	0	0	0	0	36	37	0	103	0	11	0	13	0	0	0	0	0
Pedicularis sceptrum-carolinum	not used for statistical analyses (in < 6 samples)	73	Pedicularis	Pedicularis sceptrum-carolinum	43174	[]	321412	[Pedicularis sceptrum-carolinum]	1	1	Orobanchaceae	0	0	0	0	0	0	0	0	0	0	0	0	73	0	0	0	0	0	0	0	0	0	0	0	0	0	0	0	0	0	0	0	0	0	0	0	0	0
Pedicularis schistostegia	not used for statistical analyses (in < 6 samples)	183	Pedicularis schistostegia	Pedicularis	65044	[Pedicularis schistostegia]	43174	[Pedicularis interior, Pedicularis arctoeuropaea, Pedicularis albolabiata, Pedicularis sudetica]	1	0.978261	Orobanchaceae	0	0	0	0	0	0	0	0	0	0	0	0	0	0	0	0	17	0	0	107	0	0	0	0	0	13	0	0	0	46	0	0	0	0	0	0	0	0
Pedicularis verticillata MOTU1	REF_arctic-gh_000223	657	Pedicularis	Pedicularis verticillata	43174	[]	65042	[Pedicularis verticillata]	1	1	Orobanchaceae	0	0	0	0	0	0	0	0	0	0	0	0	0	0	0	0	19	20	10	38	40	0	0	241	0	0	0	0	0	109	0	0	0	125	55	0	0	0
Pedicularis verticillata MOTU2	REF_arctic-gh_000222	230	Pedicularis	Pedicularis verticillata	43174	[]	65042	[Pedicularis verticillata]	1	1	Orobanchaceae	0	0	0	0	0	0	0	0	0	0	0	0	0	0	0	0	64	14	28	20	0	0	0	0	0	0	0	0	0	0	0	0	0	93	11	0	0	0
Pedicularis MOTU1		324	Pedicularis	Pedicularis	43174	[]	43174	[Pedicularis interior, Pedicularis arctoeuropaea, Pedicularis albolabiata, Pedicularis sudetica]	1	1	Orobanchaceae	0	0	0	0	0	0	0	0	0	0	0	0	0	0	0	0	37	0	0	129	0	0	0	0	0	38	0	0	0	26	13	0	61	10	0	0	0	0
Pedicularis MOTU2	not used for statistical analyses (in < 6 samples)	133	Pedicularis	Pedicularis	43174	[]	43174	[Pedicularis langsdorffii, Pedicularis dasyantha, Pedicularis hirsuta]	1	1	Orobanchaceae	0	0	0	0	0	0	0	0	0	0	0	0	0	0	0	0	108	13	0	0	0	0	0	0	0	0	0	0	0	0	0	0	0	0	12	0	0	0
Pedicularis MOTU3	not used for statistical analyses (in < 6 samples)	31	Pedicularis	Pedicularis	43174	[]	43174	[Pedicularis alopecuroides, Pedicularis langsdorffii]	1	1	Orobanchaceae	0	0	0	0	0	0	0	0	0	0	0	0	0	0	0	0	31	0	0	0	0	0	0	0	0	0	0	0	0	0	0	0	0	0	0	0	0	0
Plantago		11815	Plantago	Plantago	26867	[]	26867	[Plantago media, Plantago canescens]	1	1	Plantaginaceae	0	0	0	0	0	0	0	0	0	0	0	0	0	0	1529	29	273	2378	958	124	106	0	0	648	0	24	62	57	0	430	290	74	84	1583	1426	303	28	0
Pleuropogon sabinei		5091	Pleuropogon sabinei	Pleuropogon sabinei	669780	[Pleuropogon sabinei]	669780	[Pleuropogon sabinei]	1	1	Poaceae	0	0	0	0	0	0	0	0	0	0	0	0	0	0	0	0	20	268	0	0	70	284	0	0	0	26	0	908	0	2092	738	336	73	50	0	0	0	0
Poa MOTU1		4096	Poa	Poa	4544	[]	4544	[Poa supina, Poa annua]	1	1	Poaceae	0	0	0	0	18	12	267	0	0	0	67	19	15	53	0	405	28	129	55	35	92	223	28	584	710	0	101	65	15	11	0	0	0	380	10	169	23	0
Poa MOTU2		256	Poa	Pooideae	4544	[]	147368	[]	1	0.981132	Poaceae	0	0	0	0	11	0	28	0	0	0	33	16	83	43	0	0	14	0	0	0	0	12	0	0	16	0	0	0	0	0	0	0	0	0	0	0	0	0
Poales	not used for statistical analyses (in < 6 samples)	99	Poeae	Poales	147387	[]	38820	[Agrostis scabra, Agrostis canina, Blysmopsis rufa, Agrostis stolonifera, Agrostis vinealis, Agrostis kudoi, Agrostis exarata, Agrostis mertensii]	1	1	Poaceae	16	0	0	0	0	0	0	0	10	0	0	0	0	0	0	0	0	0	0	0	0	0	0	0	0	0	0	0	0	0	0	0	0	0	0	0	0	0
Poeae MOTU1		45967	Poeae	Poeae	147387	[]	147387	[Deschampsia anadyrensis, Deschampsia sukatschewii, Deschampsia cespitosa, Deschampsia obensis, Calamagrostis lapponica, Deschampsia brevifolia]	1	1	Poaceae	0	0	0	0	0	0	0	0	0	0	0	0	0	0	0	476	236	1505	942	559	972	2109	7914	10943	12433	26	342	3401	1068	350	154	16	28	427	67	518	0	0
Poeae MOTU2		2501	Poeae	Poeae	147387	[]	147387	[Anthoxanthum odoratum, Poa alpina]	1	1	Poaceae	0	0	0	35	629	57	25	0	0	0	58	18	12	982	13	485	0	0	0	0	0	0	0	0	11	0	0	0	0	0	0	0	0	52	0	36	15	16
Polemonium	not used for statistical analyses (in < 6 samples)	25	Polemonium	Polemonium	13639	[]	13639	[Polemonium acutiflorum, Polemonium boreale]	1	1	Polemoniaceae	0	0	0	0	0	0	0	0	0	0	0	0	0	0	0	0	0	0	0	0	25	0	0	0	0	0	0	0	0	0	0	0	0	0	0	0	0	0
Polemonium caeruleum	not used for statistical analyses (in < 6 samples)	77	Polemonium	Polemonium caeruleum	13639	[Polemonium californicum, Polemonium pulcherrimum, Polemonium boreale]	174663	[Polemonium caeruleum]	0.983871	1	Polemoniaceae	0	0	0	17	0	0	0	0	0	0	0	0	0	0	0	0	0	0	0	0	60	0	0	0	0	0	0	0	0	0	0	0	0	0	0	0	0	0
Pooideae		905139	Poeae	Pooideae	147387	[]	147368	[]	1	1	Poaceae	0	90	323	1050	70408	33722	87086	2270	75	0	243961	63808	29861	186220	9614	25340	4550	1875	1250	857	4094	22980	1797	13695	30493	1287	5135	9064	7538	4158	386	492	58	17696	1172	5378	3178	1979
Potentilla		159925	Potentilla	Potentilla	23204	[]	23204	[]	1	1	Rosaceae	0	0	0	0	0	0	0	0	0	0	0	0	0	0	2448	990	2274	51984	57177	875	1615	0	0	0	609	971	512	176	431	2961	975	872	324	11308	3196	4098	2162	293
Puccinellia		1045	Puccinelliinae	Puccinellia	640881	[]	13648	[]	1	1	Poaceae	0	0	0	0	0	0	0	0	0	0	0	0	0	0	0	0	88	51	0	36	0	0	0	0	0	16	443	0	0	0	0	0	11	47	0	15	0	0
Pyrola	not used for statistical analyses (in < 6 samples)	1367	Pyrola	Pyrola	13650	[]	13650	[Pyrola grandiflora, Pyrola asarifolia]	1	0.977273	Ericaceae	0	269	80	0	0	0	0	982	0	0	0	0	36	0	0	0	0	0	0	0	0	0	0	0	0	0	0	0	0	0	0	0	0	0	0	0	0	0
Pyrola grandiflora	not used for statistical analyses (in < 6 samples)	2521	Pyrola	Pyrola grandiflora	13650	[]	395309	[Pyrola grandiflora]	1	1	Ericaceae	0	517	113	0	0	0	0	1787	0	0	0	0	104	0	0	0	0	0	0	0	0	0	0	0	0	0	0	0	0	0	0	0	0	0	0	0	0	0
Pyrola rotundifolia	not used for statistical analyses (in < 6 samples)	263	Pyrola nephrophylla	Pyrola rotundifolia	642536	[Pyrola nephrophylla]	13651	[Pyrola rotundifolia]	1	1	Ericaceae	0	44	18	0	0	0	0	184	0	0	0	0	17	0	0	0	0	0	0	0	0	0	0	0	0	0	0	0	0	0	0	0	0	0	0	0	0	0
Pyrola tschanbaischanica	not used for statistical analyses (in < 6 samples)	80	Pyrola tschanbaischanica	Pyrola grandiflora	642539	[Pyrola tschanbaischanica]	395309	[Pyrola grandiflora]	1	0.977778	Ericaceae	0	48	0	0	0	0	0	32	0	0	0	0	0	0	0	0	0	0	0	0	0	0	0	0	0	0	0	0	0	0	0	0	0	0	0	0	0	0
Ranunculaceae MOTU1	not used for statistical analyses (in < 6 samples)	19230	Ranunculaceae	Ranunculaceae	3440	[]	3440	[Coptidium pallasii, Ranunculus lapponicus]	1	1	Ranunculaceae	3698	15125	0	0	0	0	0	52	0	0	0	0	0	0	355	0	0	0	0	0	0	0	0	0	0	0	0	0	0	0	0	0	0	0	0	0	0	0
Ranunculaceae MOTU2	not used for statistical analyses (in < 6 samples)	2080	Ranunculaceae	Ranunculaceae	3440	[]	3440	[Ranunculus aquatilis, Ranunculus peltatus, Batrachium eradicatum]	1	0.979167	Ranunculaceae	0	0	0	0	0	0	0	0	0	0	0	0	0	0	0	0	0	0	0	125	0	130	0	0	0	0	0	1694	0	73	0	0	58	0	0	0	0	0
Ranunculus arcticus		2319	Ranunculus arcticus	Ranunculus arcticus	286857	[Ranunculus arcticus]	286857	[Ranunculus arcticus]	1	1	Ranunculaceae	0	0	0	0	0	0	0	0	0	0	0	0	0	0	0	0	0	36	0	0	0	0	0	0	0	0	0	0	0	153	48	11	0	13	123	0	0	0
Ranunculus sceleratus MOTU1	not used for statistical analyses (in < 6 samples); REF_arctic-gh_000190	6674	Ranunculus sceleratus	Ranunculus sceleratus	147635	[Ranunculus sceleratus]	147635	[Ranunculus sceleratus]	1	1	Ranunculaceae	0	89	6511	20	0	0	0	0	0	0	0	0	0	0	0	0	0	0	0	0	0	0	0	0	10	0	0	44	0	0	0	0	0	0	0	0	0	0
Ranunculus sceleratus MOTU2	not used for statistical analyses (in < 6 samples); REF_arctic-gh_000189	198	Ranunculus sceleratus	Ranunculus sceleratus	147635	[Ranunculus sceleratus]	147635	[Ranunculus sceleratus]	1	1	Ranunculaceae	0	0	198	0	0	0	0	0	0	0	0	0	0	0	0	0	0	0	0	0	0	0	0	0	0	0	0	0	0	0	0	0	0	0	0	0	0	0
Ranunculus MOTU1	Ranunculus_Group4	179607	Ranunculus	Ranunculus	3445	[]	3445	[Ranunculus hyperboreus, Ranunculus gmelinii]	1	1	Ranunculaceae	0	2622	173125	933	0	0	0	0	0	0	0	0	11	0	0	0	0	0	0	40	0	58	0	0	154	49	65	1252	0	233	0	0	129	0	0	0	0	0
Ranunculus MOTU2	not used for statistical analyses (in < 6 samples); Ranunculus_Group1	80	Ranunculus	Ranunculus	3445	[]	3445	[Ranunculus turneri, Ranunculus acris, Ranunculus subborealis]	1	1	Ranunculaceae	0	0	0	0	0	0	0	0	0	0	0	0	0	0	0	0	0	0	0	0	0	0	0	0	0	0	0	0	0	0	0	0	0	0	0	0	0	0
Rumex		3778	Rumex	Rumex	3618	[]	3618	[Rumex longifolius, Rumex aquaticus, Rumex confertus, Rumex maritimus, Rumex pallidus, Rumex pseudonatronatus, Rumex sibiricus, Rumex arcticus, Rumex graminifolius, Rumex thyrsiflorus, Rumex hultenii, Rumex acetosa, Rumex acetosella]	1	1	Polygonaceae	0	0	0	0	0	0	0	0	0	0	0	0	0	0	0	0	0	0	0	0	0	24	0	0	0	0	0	199	0	100	0	24	0	1470	747	91	1078	45
Saliceae		4495000	Saliceae	Saliceae	238069	[]	238069	[]	1	1	Salicaceae	0	5593	10176	291707	190973	121377	88809	142	49	11826	18579	349	35812	10763	143840	128632	71618	109701	111383	34778	154314	3057	0	6573	79281	153429	262957	29664	74078	121152	114024	328211	21743	117071	47994	93926	280865	18459
Sanguisorba	not used for statistical analyses (in < 6 samples)	21	Acaena	Sanguisorba	137429	[]	57937	[Sanguisorba officinalis, Sanguisorba canadensis]	1	0.980769	Rosaceae	0	0	0	0	0	0	0	0	0	0	0	0	0	0	0	0	0	0	0	0	0	21	0	0	0	0	0	0	0	0	0	0	0	0	0	0	0	0
Sanguisorba officinalis		2838	Sanguisorbinae	Sanguisorba officinalis	1183420	[]	137457	[Sanguisorba officinalis]	1	1	Rosaceae	0	0	0	0	0	0	0	0	0	0	0	0	0	0	0	0	0	0	0	37	138	2285	0	0	0	0	0	18	0	0	0	331	19	10	0	0	0	0
Saussurea	not used for statistical analyses (in < 6 samples)	421	Saussurea	Saussurea	41629	[]	41629	[Saussurea alpina, Saussurea parviflora, Saussurea nuda, Saussurea angustifolia]	1	1	Asteraceae	0	0	0	0	0	0	0	0	0	0	0	0	0	0	0	0	0	0	0	0	0	0	0	0	0	0	0	0	0	398	0	0	0	0	0	0	0	0
Saxifraga hirculus		138	Saxifraga	Saxifraga hirculus	3798	[]	159962	[Saxifraga hirculus]	1	1	Saxifragaceae	0	0	0	0	0	0	0	0	0	0	0	0	0	0	0	0	26	0	0	22	0	0	0	0	0	0	0	0	0	0	0	0	0	0	0	0	0	0
Saxifraga MOTU1	Saxifraga_Group12	3662	Saxifraga	Saxifraga	3798	[]	3798	[Saxifraga funstonii, Saxifraga tricuspidata, Saxifraga bronchialis, Saxifraga spinulosa]	1	1	Saxifragaceae	0	36	12	674	0	2536	91	0	0	0	0	0	29	0	0	0	0	0	0	0	0	0	0	0	284	0	0	0	0	0	0	0	0	0	0	0	0	0
Saxifraga MOTU2	not used for statistical analyses (in < 6 samples); Saxifraga_Group2	43	Saxifraga	Saxifraga	3798	[]	3798	[Saxifraga cernua, Saxifraga radiata, Saxifraga rivularis, Saxifraga hyperborea, Saxifraga bracteata]	1	1	Saxifragaceae	0	0	0	0	0	0	0	0	0	0	0	0	0	0	0	0	0	0	0	0	0	0	0	0	30	0	0	0	0	0	0	0	0	0	0	0	0	0
Saxifragaceae	not used for statistical analyses (in < 6 samples)	37	Saxifragaceae	Saxifragaceae	3792	[]	3792	[Saxifraga tenuis, Micranthes nivalis]	1	1	Saxifragaceae	0	0	0	0	0	0	0	0	0	0	0	0	0	0	0	0	0	0	0	0	0	0	0	0	0	0	0	0	0	0	0	0	0	0	0	0	37	0
Selineae		1581	Selineae	Selineae	241792	[]	241792	[Cnidium cnidiifolium, Angelica sylvestris]	1	1	Apiaceae	0	0	0	0	0	0	0	0	0	0	0	0	0	0	0	327	0	0	0	27	156	0	0	0	0	120	114	0	0	633	103	10	19	72	0	0	0	0
Senecioninae	not used for statistical analyses (in < 6 samples)	168	Asteraceae	Senecioninae	4210	[]	795077	[Packera paupercula, Packera heterophylla, Senecio pseudoarnica, Senecio ambraceus, Packera hyperborealis, Packera indecora, Senecio lugens, Senecio nemorensis, Packera ogotorukensis, Packera pauciflora]	1	1	Asteraceae	0	0	0	0	0	0	0	0	0	0	0	0	0	0	12	0	0	0	0	0	0	16	0	0	0	0	0	0	0	126	0	0	0	0	0	0	0	0
Silene	not used for statistical analyses (in < 6 samples)	15	Silene	Silene	3573	[]	3573	[Silene involucrata, Silene pauciflora, Silene violascens, Silene ostenfeldii, Silene uralensis, Silene sorensenis, Silene soczavana]	1	1	Caryophyllaceae	0	0	0	0	0	0	0	0	0	0	0	0	0	0	0	0	0	0	0	0	0	0	0	0	0	0	0	0	0	0	0	0	0	0	0	0	0	15
Stellaria		673	Stellaria	Stellaria	13273	[]	13273	[Stellaria longipes, Stellaria calycantha, Stellaria fischeriana, Stellaria palustris, Stellaria umbellata, Stellaria crassifolia]	1	1	Caryophyllaceae	0	0	0	0	0	0	0	0	0	0	0	0	0	0	0	0	12	0	20	13	0	0	445	0	0	0	0	0	0	114	0	0	0	10	19	0	0	0
Stellaria borealis	not used for statistical analyses (in < 6 samples)	28	Stellaria borealis	Stellaria borealis	669842	[Stellaria borealis]	669842	[Stellaria borealis]	1	1	Caryophyllaceae	0	0	0	0	0	0	0	0	0	0	0	0	0	0	0	0	0	0	0	0	0	0	28	0	0	0	0	0	0	0	0	0	0	0	0	0	0	0
Stellaria longifolia	not used for statistical analyses (in < 6 samples)	20	Stellaria longifolia	Stellaria longifolia	228247	[Stellaria longifolia]	228247	[Stellaria longifolia]	1	1	Caryophyllaceae	0	0	0	0	0	0	0	0	0	0	0	0	0	0	0	0	0	0	0	0	0	0	20	0	0	0	0	0	0	0	0	0	0	0	0	0	0	0
Vaccinium vitis-idaea	not used for statistical analyses (in < 6 samples)	172507	Vaccinium vitis-idaea	Vaccinium vitis-idaea	180772	[Vaccinium vitis-idaea]	180772	[Vaccinium vitis-idaea]	1	1	Ericaceae	495	0	0	0	0	0	0	0	0	0	0	0	0	0	172012	0	0	0	0	0	0	0	0	0	0	0	0	0	0	0	0	0	0	0	0	0	0	0
Valeriana		2363	Valeriana	Valeriana	19952	[]	19952	[Valeriana septentrionalis, Valeriana capitata, Valeriana sambucifolia, Valeriana transjenisensis]	1	1	Caprifoliaceae	0	0	0	2002	0	0	0	0	0	0	0	0	0	0	0	142	0	0	42	0	0	0	0	0	0	0	0	0	0	0	0	0	0	0	10	0	0	0
[truncated: 21 more columns]

## Sheet: aquatic_dataset
Sequence counts (best identity =1) corresponding to 21 aquatic trnL P6 loop plant MOTUs derived from 54 sediment samples along the BK-8 permafrost core. The data are deposited at https://doi.org/10.1594/PANGAEA.870897.
											depth (m)	0.1	0.35	0.55	0.85	1.1	1.2	1.3	1.6	1.8	1.9	2.1	2.4	2.6	2.85	3.3	8.35	8.75	8.9	8.95	9	9.15	9.6	9.7	9.9	10.15	10.3	10.4	10.65	10.72	10.9	11.4	11.7	11.85	12.12	12.25	12.45	12.95	13.1
final name	comments	new_counts	scientific_name_by_db.gh_embl117.good	scientific_name_by_db.arctborbryo_gh	taxid_by_db.gh_embl117.good	species_list.gh_embl117.good	taxid_by_db.arctborbryo_gh	species_list.arctborbryo_gh	best_identity.gh_embl117.good	best_identity.arctborbryo_gh	family_name	EH111	EH119	EH121	EH112	EH113	EH114	EH115	EH116	EH117	EH118	EH133	EH120	EH123	EH124	EH125	EH126	EH127	EH128	EH129	EH130	EH131	EH132	EH135	EH136	EH137	EH138	EH139	EH140	EH141	EH142	EH143	EH144	EH145	EH147	EH148	EH149	EH150	EH151
Caltha palustris		221467	Caltha	Caltha	3448	[]	3448	[Caltha palustris, Caltha arctica]	1	1	Ranunculaceae	0	0	67	0	0	0	0	0	0	0	0	0	0	0	183	61	1146	240	58	2005	965	19373	0	625	19074	2291	11243	14447	215	19155	624	115	5896	95	0	0	22	28
Carex aquatilis		3042329	Carex aquatilis	Carex aquatilis	140788	[Carex aquatilis]	140788	[Carex aquatilis]	1	1	Cyperaceae	10156	0	0	0	0	0	0	0	0	0	0	0	8341	0	3945	0	1016	0	143	3950	53318	2927	1523	2060	8062	11866	1172751	2235	1658586	15405	0	0	0	10	47	22	0	10
Carex maritima	not used for statistical analyses (in < 3 samples)	51	Carex maritima	Carex maritima	240694	[Carex maritima]	240694	[Carex maritima]	1	1	Cyperaceae	0	0	0	0	0	0	0	0	0	0	0	0	0	0	0	0	0	0	0	0	0	0	0	0	0	38	0	0	0	0	0	0	0	0	0	13	0	0
Carex media		58	Carex media	Carex	140785	[Carex media]	13398	[]	1	0.987805	Cyperaceae	0	0	0	0	0	0	0	0	0	0	0	0	0	0	0	0	0	0	0	0	0	0	0	0	0	0	26	0	0	10	0	0	0	0	11	11	0	0
Carex microglochin		215	Carex	Carex microglochin	13398	[]	234725	[Carex microglochin]	1	1	Cyperaceae	0	0	0	0	0	0	0	0	0	0	0	0	0	0	0	0	0	0	0	0	0	0	0	0	0	0	110	0	55	35	0	0	0	0	0	0	0	0
Carex MOTU1		378350	Carex	Carex	13398	[]	13398	[]	1	1	Cyperaceae	10	0	0	0	29	0	0	0	0	0	0	0	743	0	15	983	826	120	53	1636	10722	0	0	0	21	4770	187280	993	49796	23399	728	0	45	609	37645	31775	0	847
Carex MOTU2		5791	Carex	Carex	13398	[]	13398	[Carex bebbii, Carex pallida, Carex echinata, Carex crawfordii, Carex sychnocephala, Carex interior, Carex leporina, Carex sterilis, Carex chordorrhiza, Carex foenea, Carex bohemica, Carex praticola, Carex pseudocuraica, Carex sartwellii]	1	1	Cyperaceae	0	0	0	0	0	0	0	0	0	0	0	0	0	0	0	76	39	0	0	0	103	0	0	0	11	83	417	0	0	0	311	0	0	79	200	237	0	0
Carex MOTU3		260	Carex	Carex	13398	[]	13398	[Carex cespitosa, Carex stylosa, Carex meyeriana]	1	1	Cyperaceae	0	0	0	0	0	0	0	0	0	0	0	0	0	0	0	0	0	0	0	48	0	0	0	0	0	0	67	0	22	0	0	0	0	0	24	61	0	0
Carex MOTU4	not used for statistical analyses (in < 3 samples)	87	Carex	Carex	13398	[]	13398	[Carex microchaeta, Carex digitata, Carex ornithopoda]	1	1	Cyperaceae	0	0	0	0	0	0	0	0	0	0	0	0	0	0	0	0	0	0	0	0	0	0	0	0	0	0	48	0	13	0	0	0	0	0	16	10	0	0
Carex MOTU5	not used for statistical analyses (in < 3 samples)	30	Cariceae	Carex	986155	[]	13398	[Carex obtusata, Carex pauciflora, Carex nardina, Carex rupestris]	1	1	Cyperaceae	0	0	0	0	0	0	0	0	0	0	0	0	0	0	0	0	0	0	0	0	0	0	0	0	0	0	0	0	0	0	0	0	0	0	20	0	0	0
Equisetum		46229	Equisetum	Equisetum	3257	[]	3257	[Equisetum fluviatile, Equisetum arvense, Equisetum sylvaticum]	1	1	Equisetaceae	0	0	0	0	0	10	4731	21046	9114	4791	2629	3246	26	568	68	0	0	0	0	0	0	0	0	0	0	0	0	0	0	0	0	0	0	0	0	0	0	0
Eriophorum MOTU1	Eriophorum_Group1	521989	Eriophorum	Eriophorum	46326	[]	46326	[Eriophorum callitrix, Eriophorum latifolium, Eriophorum angustifolium, Eriophorum brachyantherum, Eriophorum vaginatum]	1	1	Cyperaceae	8455	246817	11182	0	20	0	49	5707	190	0	1833	0	52851	0	0	272	49	0	62	1097	219	12873	28547	5831	18436	1205	35729	32513	5884	40901	6730	0	0	29	0	0	0	0
Eriophorum MOTU2	Eriophorum_Group2	1109	Eriophorum	Eriophorum	46326	[]	46326	[Eriophorum russeolum, Eriophorum scheuchzeri]	1	1	Cyperaceae	0	445	0	0	0	0	0	0	0	0	0	0	0	0	0	0	0	0	0	0	0	592	0	0	0	25	0	14	0	10	0	0	0	0	0	0	0	0
Hippuris		5851	Hippuris	Hippuris	39200	[]	39200	[Hippuris vulgaris, Hippuris tetraphylla]	1	1	Plantaginaceae	0	0	0	0	0	0	0	0	0	0	0	0	0	0	0	0	10	0	0	0	0	0	0	0	236	23	137	1023	0	0	0	0	10	0	0	0	0	0
Luzula	not used for statistical analyses (in < 3 samples)	450	Luzula	Luzula	46322	[]	46322	[Luzula confusa, Luzula wahlenbergii, Luzula nivalis, Luzula arcuata]	1	1	Juncaceae	437	0	0	0	0	0	0	0	0	0	0	0	0	0	0	0	0	0	0	13	0	0	0	0	0	0	0	0	0	0	0	0	0	0	0	0	0	0
Luzula parviflora	not used for statistical analyses (in < 3 samples)	3070	Luzula	Luzula parviflora	46322	[]	46323	[Luzula parviflora]	1	1	Juncaceae	3070	0	0	0	0	0	0	0	0	0	0	0	0	0	0	0	0	0	0	0	0	0	0	0	0	0	0	0	0	0	0	0	0	0	0	0	0	0
Poinae		191266	Poinae	Poinae	640628	[]	640628	[Arctophila fulva, Dupontia fisheri]	1	1	Poaceae	0	516	1874	0	16	10	23	0	0	0	37	269	1083	339	0	13029	102	528	468	497	2039	14953	53222	47448	24902	1197	3477	21007	1881	201	81	18	20	151	0	36	16	0
Potamogeton		3249	Potamogeton	Potamogeton	13228	[]	13228	[Potamogeton foliosus, Potamogeton epihydrus, Potamogeton friesii, Potamogeton pusillus, Potamogeton natans, Potamogeton rutilus, Potamogeton compressus, Potamogeton sibiricus, Potamogeton trichoides]	1	1	Potamogetonaceae	0	0	0	0	0	0	0	0	0	0	0	0	0	0	0	0	16	0	0	44	0	0	0	0	3120	0	13	0	0	0	0	0	0	0	0	0	0	0
Sparganium		1255	Sparganium	Sparganium	4729	[]	4729	[Sparganium natans, Sparganium friesii, Sparganium hyperboreum]	1	1	Typhaceae	0	0	0	0	0	0	0	0	0	0	0	0	0	0	0	0	0	0	0	0	0	0	0	200	1043	12	0	0	0	0	0	0	0	0	0	0	0	0
Stuckenia		146296	Stuckenia	Stuckenia	246706	[]	246706	[Stuckenia filiformis, Stuckenia vaginata]	1	1	Potamogetonaceae	0	0	0	0	0	0	0	0	0	0	0	0	0	0	0	44	77	0	0	19339	0	2349	0	839	54069	172	6752	18021	502	40515	2526	0	906	13	0	0	0	0
Tephroseris		21878	Asteraceae	Tephroseris	4210	[]	151998	[Tephroseris palustris, Tephroseris yukonensis, Tephroseris atropurpurea, Tephroseris congesta, Tephroseris integrifolia, Tephroseris frigida, Tephroseris kjellmanii, Tephroseris lindstroemii]	1	1	Asteraceae	15	383	2682	0	0	0	474	0	0	0	0	111	5302	0	4100	0	66	177	0	2306	62	335	0	0	240	271	301	53	37	2761	175	0	69	0	0	0	0	0
[truncated: 21 more columns]
