# Supplementary material for: Sedimentary ancient DNA and pollen reveal the composition of plant organic matter in Late Quaternary permafrost sediments of the Buor Khaya Peninsula (north-eastern Siberia)
Source: Copernicus journal article supplement (doi:10.5194/bg-14-575-2017), 2017-02-07
Supplement: Supplementary file 4 [file S6_exoticDNAsequences.xlsx]

## Sheet: Tabelle1
List of sequences with best identity = 1.0 assigned to cultivated plant taxa or non-Arctic taxa or which are probable contamination. All calculations are based on counts with best identity=1.0.
									depth (m)	0.1	0.35	0.55	0.85	1.1	1.2	1.3	1.6	1.8	1.9	2.1	2.4	2.6	2.85	3.3	8.35	8.75	8.9	8.95	9	9.15	9.6	9.7	9.9	10.15	10.3	10.4	10.65	10.72	10.9	11.4	11.7	11.85	12.12	12.25	12.45	12.95	13.1	13.4	13.5
final name	comment	counts	scientific_name_by_db.gh_embl117	scientific_name_by_db.arctborbryo_gh	taxid_by_db.gh_embl117	taxid_by_db.arctborbryo_gh	best_identity.gh_embl117	best_identity.arctborbryo_gh	family_name	EH111	EH119	EH121	EH112	EH113	EH114	EH115	EH116	EH117	EH118	EH133	EH120	EH123	EH124	EH125	EH126	EH127	EH128	EH129	EH130	EH131	EH132	EH135	EH136	EH137	EH138	EH139	EH140	EH141	EH142	EH143	EH144	EH145	EH147	EH148	EH149	EH150	EH151	EH152	EH153
Acacia	cultivated plant	61574	Acacia auriculiformis	Magnoliophyta	205027	3398	1	0.836066	Fabaceae	0	0	0	0	0	0	0	0	0	0	0	0	0	0	0	0	0	0	0	0	0	0	0	0	0	0	0	0	0	0	0	0	0	0	0	0	0	0	0	0
Allium sativum	cultivated plant	17	Allium sativum	Allium	4682	4678	1	0.93617	Amaryllidaceae	0	0	0	0	0	0	0	0	0	17	0	0	0	0	0	0	0	0	0	0	0	0	0	0	0	0	0	0	0	0	0	0	0	0	0	0	0	0	0	0
Anacardium	cultivated plant	146	Anacardium occidentale	eudicotyledons	171929	71240	1	0.821429	Anacardiaceae	0	0	0	0	0	0	0	0	0	0	0	0	0	0	0	0	0	0	0	0	0	0	0	0	146	0	0	0	0	0	0	0	0	0	0	0	0	0	0	0
Apiaceae MOTU3	cultivated plant; identical with Coriandrum sativum	7344	Apioideae	Apiaceae	241778	4037	1	0.977778	Apiaceae	0	0	0	0	2464	0	0	0	0	0	0	0	0	0	4880	0	0	0	0	0	0	0	0	0	0	0	0	0	0	0	0	0	0	0	0	0	0	0	0	0
Arabidopsis GROUP 1	cultivated plant	30903	Brassicaceae	Arabidopsis	3700	3701	1	1	Brassicaceae	0	0	0	0	30903	0	0	0	0	0	0	0	0	0	0	0	0	0	0	0	0	0	0	0	0	0	0	0	0	0	0	0	0	0	0	0	0	0	0	0
Avena	cultivated plant	880	Avena	Pooideae	4496	147368	1	0.981132	Poaceae	0	0	0	0	19	15	37	0	0	0	73	474	15	56	0	12	15	0	0	0	0	10	0	28	14	19	11	0	0	0	0	0	0	28	0	11	20	13	0	10
Aveninae Group 1	cultivated plant	5627	Poaceae	Magnoliophyta	4479	3398	1	1	Poaceae	0	0	0	0	0	0	0	0	0	0	0	0	0	0	0	2936	321	0	26	0	72	0	0	0	0	0	0	280	0	153	86	40	0	477	263	328	257	138	12	0
Brassicaceae	cultivated plant; identical with Brassica napus	233	Brassicaceae	Cakile	3700	220482	1	1	Brassicaceae	0	0	0	0	0	0	0	0	0	13	0	0	220	0	0	0	0	0	0	0	0	0	0	0	0	0	0	0	0	0	0	0	0	0	0	0	0	0	0	0
Brassicaceae	cultivated plant; identical with Brassica napus	147	Brassicaceae	Cakile	3700	220482	1	0.974359	Brassicaceae	0	0	0	0	0	0	0	0	0	0	0	0	0	0	0	0	0	0	0	0	0	0	0	0	0	0	0	0	0	147	0	0	0	0	0	0	0	0	0	0
Briza itatiaiae	not Arctic	62	Briza itatiaiae	Poales	511979	38820	1	0.982759	Poaceae	31	0	0	0	0	0	0	0	31	0	0	0	0	0	0	0	0	0	0	0	0	0	0	0	0	0	0	0	0	0	0	0	0	0	0	0	0	0	0	0
Capsicum	cultivated plant	45	Capsicum	eudicotyledons	4071	71240	1	0.822222	Solanaceae	0	45	0	0	0	0	0	0	0	0	0	0	0	0	0	0	0	0	0	0	0	0	0	0	0	0	0	0	0	0	0	0	0	0	0	0	0	0	0	0
Cucurbitaceae	cultivated plant	17	Cucurbitaceae	Saxifragaceae	3650	3792	1	0.884615	Cucurbitaceae	0	0	0	0	0	0	0	0	0	0	0	0	0	0	0	0	0	0	0	0	0	0	0	0	0	0	0	0	0	17	0	0	0	0	0	0	0	0	0	0
Cucurbitaceae	cultivated plant	11	Cucurbitaceae	Magnoliophyta	3650	3398	1	0.846154	Cucurbitaceae	0	0	0	0	0	0	0	0	0	0	0	0	0	0	0	0	0	0	0	0	0	0	0	0	0	0	0	0	0	11	0	0	0	0	0	0	0	0	0	0
Glycine max	cultivated plant	1063	Glycine	Magnoliophyta	3846	3398	1	0.901961	Fabaceae	0	0	515	0	0	0	0	0	0	548	0	0	0	0	0	0	0	0	0	0	0	0	0	0	0	0	0	0	0	0	0	0	0	0	0	0	0	0	0	0
Hevea brasiliensis	cultivated plant	61	Hevea brasiliensis	Magnoliophyta	3981	3398	1	0.785714	Euphorbiaceae	0	0	0	0	0	0	0	0	0	0	0	61	0	0	0	0	0	0	0	0	0	0	0	0	0	0	0	0	0	0	0	0	0	0	0	0	0	0	0	0
Hordeum GROUP 10	cultivated plant	12	Hordeum	Hordeum	4512	4512	1	0.978723	Poaceae	0	0	0	0	0	0	0	0	0	0	0	0	0	0	0	0	0	0	0	0	0	0	0	0	0	0	0	0	0	0	0	0	0	0	12	0	0	0	0	0
Hordeum GROUP 9, Triticeae GROUP 5, GROUP 2	cultivated plant	1345	Triticeae	Hordeum	147389	4512	1	1	Poaceae	0	0	0	0	0	0	0	0	0	0	0	0	0	0	0	0	120	94	109	38	227	0	0	0	0	17	201	0	0	0	0	0	0	147	305	0	0	0	0	0
Lactuca sativa	cultivated plant	527	Lactuca sativa	Asteraceae	4236	4210	1	0.98	Asteraceae	0	0	0	0	0	0	0	0	0	0	0	0	0	0	0	0	0	0	0	0	0	0	0	360	0	0	0	0	0	0	0	0	0	0	0	0	0	0	0	0
Lauraceae	probable contamination	53	Lauraceae	eudicotyledons	3433	71240	1	0.862745	Lauraceae	0	0	0	16	37	0	0	0	0	0	0	0	0	0	0	0	0	0	0	0	0	0	0	0	0	0	0	0	0	0	0	0	0	0	0	0	0	0	0	0
Lauraceae	probable contamination	32604	Persea	Magnoliophyta	3434	3398	1	0.821429	Lauraceae	0	184	0	1418	29807	0	0	0	667	72	0	62	0	0	0	0	0	0	0	0	0	0	0	0	0	52	0	0	0	0	342	0	0	0	0	0	0	0	0	0
Lens culinaris	cultivated plant	169	Lens	Trifolium	3863	3898	1	0.960784	Fabaceae	0	0	0	0	0	0	0	0	0	0	0	0	0	0	0	0	0	169	0	0	0	0	0	0	0	0	0	0	0	0	0	0	0	0	0	0	0	0	0	0
Medicago sativa	probable contamination	299	Medicago sativa	Papilionoideae	3879	3814	1	0.963636	Fabaceae	0	0	0	0	0	0	0	0	0	0	0	0	0	0	0	0	0	0	0	0	0	0	299	0	0	0	0	0	0	0	0	0	0	0	0	0	0	0	0	0
Musaceae	cultivated plant	15499	Musaceae	Typha latifolia	4637	4733	1	0.897959	Musaceae	0	0	0	1998	6915	0	0	0	0	5795	0	0	0	361	0	0	0	11	0	0	0	389	0	0	0	0	0	0	0	0	0	0	0	0	30	0	0	0	0	0
Oryza sativa	cultivated plant	34132	BEP clade	Magnoliophyta	359160	3398	1	0.942308	Poaceae	0	0	0	0	0	0	0	0	0	0	0	0	0	0	0	0	0	0	0	0	0	0	0	0	0	0	0	0	0	0	0	0	0	0	0	0	0	0	0	0
PACMAD clade	PACMAD clade; identical with Zea mays	54967	PACMAD clade	Muhlenbergia richardsonis	147370	65983	1	1	Poaceae	0	0	37	0	0	1344	0	0	0	0	0	0	0	53255	0	112	0	0	0	0	0	0	0	0	0	0	0	0	0	0	171	0	0	0	0	0	0	0	0	0
PACMAD clade	PACMAD clade; identical with Zea mays	89	Orcuttia pilosa	PACMAD clade	251268	147370	1	0.980392	Poaceae	0	0	0	0	0	0	0	0	0	0	0	0	0	89	0	0	0	0	0	0	0	0	0	0	0	0	0	0	0	0	0	0	0	0	0	0	0	0	0	0
Picea GROUP 1	probable contamination	15	Picea	Picea	3328	3328	1	1	Pinaceae	0	0	0	0	0	0	0	0	0	0	15	0	0	0	0	0	0	0	0	0	0	0	0	0	0	0	0	0	0	0	0	0	0	0	0	0	0	0	0	0
Pinus	probable contamination	191791	Pinus	Pinus	139271	3337	0.977778	1	Pinaceae	0	0	0	0	0	0	51	0	0	0	0	0	0	101680	0	0	0	0	0	0	0	0	0	2319	0	0	0	0	0	0	0	0	0	0	0	0	0	0	0	0
Poa apiculata	not Arctic	3066	Poa apiculata	Pooideae	568982	147368	1	0.981132	Poaceae	0	0	0	0	21	12	407	0	0	0	80	19	18	73	0	13	0	0	0	0	0	567	709	959	26	0	0	83	36	0	0	0	0	10	0	33	0	0	0	0
Prunus GROUP 16	probable contamination	227	Prunus	Prunus	3754	3754	1	1	Rosaceae	0	0	0	0	0	0	0	0	0	0	0	0	0	0	0	0	0	0	0	0	0	0	0	0	0	0	0	227	0	0	0	0	0	0	0	0	0	0	0	0
Quercus	probable contamination	93	Quercus	Ranunculaceae	3511	3440	1	0.857143	Fagaceae	0	0	0	0	0	0	0	0	42	0	0	0	0	0	0	0	0	0	0	0	0	0	0	0	0	0	0	51	0	0	0	0	0	0	0	0	0	0	0	0
Quercus	probable contamination	207	Quercus	eudicotyledons	3511	71240	1	0.842105	Fagaceae	0	0	0	0	0	0	0	0	0	207	0	0	0	0	0	0	0	0	0	0	0	0	0	0	0	0	0	0	0	0	0	0	0	0	0	0	0	0	0	0
Rubus idaeus	probable contamination	101	Rubus idaeus	Rubus	32247	23216	1	1	Rosaceae	0	0	0	0	0	0	0	0	0	0	0	0	0	0	0	0	0	34	22	0	0	0	0	0	0	0	0	0	0	0	0	0	0	17	12	0	16	0	0	0
Sambucus cerulea	cultivated plant	17	Sambucus cerulea	campanulids	57006	91882	1	0.98	Adoxaceae	0	0	17	0	0	0	0	0	0	0	0	0	0	0	0	0	0	0	0	0	0	0	0	0	0	0	0	0	0	0	0	0	0	0	0	0	0	0	0	0
Solanaceae	cultivated plant	63	Lycopersicon	asterids	49274	71274	1	0.844444	Solanaceae	0	0	0	0	0	0	0	0	0	0	0	0	0	0	0	0	0	63	0	0	0	0	0	0	0	0	0	0	0	0	0	0	0	0	0	0	0	0	0	0
Theaceae	cultivated plant	126929	Theaceae	Magnoliophyta	27065	3398	1	0.903846	Theaceae	0	0	0	0	0	0	0	0	0	0	0	0	0	126929	0	0	0	0	0	0	0	0	0	0	0	0	0	0	0	0	0	0	0	0	0	0	0	0	0	0
Triticeae	cultivated plant	65890	Pooideae	Triticeae	147368	147389	1	1	Poaceae	0	0	0	0	0	0	0	0	0	0	31	0	0	33	0	0	0	17	0	0	0	0	16	0	0	0	0	0	0	0	0	13	0	11	139	68	260	0	11	0
									Sum read counts per sample	31	229	569	3432	70166	1371	495	0	740	6652	199	616	253	282476	4880	3073	456	388	157	38	299	966	1024	3666	186	88	212	641	36	328	599	53	0	690	761	440	553	151	23	10
									sum total read counts	89860	317436	251731	341456	532432	200299	194204	33689	129415	33638	268517	70709	163947	531656	375825	182762	90272	183450	186401	74915	266399	95615	105894	93353	256327	182499	1703255	140601	1803345	296774	139523	333784	31434	204403	103942	146561	300022	23995	87141	116760
									percentage exotic of total read counts	0.000344981	0.000721405	0.00226035	0.0100511	0.131784	0.00684477	0.00254887	0	0.00571804	0.197753	0.000741108	0.00871176	0.00154318	0.531313	0.0129848	0.0168142	0.0050514	0.00211502	0.00084227	0.000507242	0.00112238	0.010103	0.00967005	0.0392703	0.000725636	0.000482194	0.000124468	0.004559	1.99629e-05	0.00110522	0.0042932	0.000158785	0	0.00337568	0.00732139	0.00300216	0.0018432	0.00629298	0.00026394	8.56458e-05
[truncated: 24 more columns]
