# Supplementary material for: Sedimentary ancient DNA and pollen reveal the composition of plant organic matter in Late Quaternary permafrost sediments of the Buor Khaya Peninsula (north-eastern Siberia)
Source: Copernicus journal article supplement (doi:10.5194/bg-14-575-2017), 2017-02-07
Supplement: Supplementary file 5 [file S7_Pollen_counts.xlsx]

## Sheet: Pollen_spores_algae_counts
Pollen, spore and algae counts from 32 sediment samples along the BK-8 permafrost core. The data are deposited at https://doi.org/10.1594/PANGAEA.870897.
Pollen							0.1	0.35	0.55	0.85	1.1	1.6	1.8	2.4	2.6	2.85	8.75	8.9	9	9.7	9.9	10.3	10.4	10.9	11.7	12.12	12.25	12.95	13.4	13.95	14.65	15.2	16	17	17.05	17.7	18.15	18.48
Code	Name	Element	Units	Context	Taphonomy	Group	DP02	DP04	DP05	DP06	DP7b	DP09	DP10a	DP12	DP13	DP14	DP17	DP20	DP19	DP23	DP24	DP26	DP27	DP30	DP32	DP34	DP36	DP37	DP39	DP42	DP44	DP46	DP49	DP50	DP51	DP52	DP53	DP54
	depth						0.1	0.35	0.55	0.85	1.1	1.6	1.8	2.4	2.6	2.85	8.75	8.9	9	9.7	9.9	10.3	10.4	10.9	11.7	12.12	12.25	12.95	13.4	13.95	14.65	15.2	16	17	17.05	17.7	18.15	18.48
AlnFrutT	Alnus fruticosa-type					A	53	3	2	8	9	3	4	4	6	13	4	4	1	2	3	4	8	6	3	1	6	5	3	3	2	6	7	13	23	25	19	13
b.nana	B. sect. Nanae					A	108	168	115	79	57	133	97	95	140	153	9	8	5	3	5	16	7	11	5	3	8	8	8	28	8	10	24	23	41	46	31	45
b.alba	Betula sect. Albae					A	0	0	0	0	0	0	0	0	0	3	0	0	0	0	0	0	0	0	0	0	0	0	0	0	0	0	0	0	0	0	0	0
larix	Larix					A	1	0	0	1	1	1	0	0	0	1	1	2	0	0	1	1	1	2	0	0	1	5	0	4	1	3	7	1	2	2	5	6
PinCembT	P. s/g Haploxylon-type					A	2	0	0	2	1	1	0	2	1	2	4	7	0	4	1	2	2	4	0	4	4	7	2	1	5	6	6	3	8	9	9	5
Picea	Picea					A	0	1	0	0	0	0	0	0	2	0	1	3	1	2	1	2	1	4	2	1	4	3	1	0	0	2	4	4	6	4	7	6
pin	Pinaceae indef.					A	0	1	0	0	0	1	0	0	0	0	1	1	0	1	3	5	5	2	1	1	8	6	0	2	3	4	2	2	4	3	5	6
PinSylvT	Pinus s/g Diploxylon-type					A	0	0	0	0	0	0	0	0	0	0	0	0	0	0	0	0	0	0	0	0	0	1	0	0	0	0	0	0	0	0	0	1
psp	Pinus					A	0	0	0	0	0	0	1	0	0	0	0	0	0	0	2	1	0	0	0	0	0	0	0	2	0	4	0	0	1	0	0	0
tilia	Tilia					Q	0	0	0	0	0	0	0	0	0	0	0	0	0	0	0	0	0	0	0	0	0	0	0	0	0	0	0	0	0	0	0	1
qu	Cedrus					Q	0	0	0	0	0	0	0	0	0	1	0	0	0	0	0	0	0	0	0	0	0	1	0	0	0	0	0	0	0	0	0	0
jugl	cf. Juglans					Q	0	0	0	0	0	0	0	1	0	1	0	0	0	0	0	0	1	1	0	0	0	0	0	0	0	0	0	0	0	0	0	1
ulm	Ulmus					Q	0	0	0	0	0	0	0	0	0	0	0	1	0	0	0	0	0	0	0	0	0	0	0	0	0	0	0	0	0	0	0	0
Salix	Salix					A	3	37	14	107	122	10	10	11	11	7	24	7	13	3	5	3	3	8	12	3	30	0	5	6	17	10	5	17	6	16	20	35
Api	Apiaceae					B	0	0	0	0	0	0	0	0	0	0	0	0	0	0	0	0	0	0	0	1	0	0	0	0	0	0	0	0	0	0	0	0
Artemisi	Artemisia					B	2	3	6	9	4	4	4	6	3	3	19	29	19	6	7	19	17	9	6	3	18	13	15	8	9	1	62	24	10	15	6	22
AsterT	Asteraceae					B	14	11	18	3	3	10	5	10	10	8	4	10	1	1	4	4	7	8	3	3	6	9	10	7	10	10	11	6	8	4	3	8
brass	Brassicaceae					B	1	2	2	3	1	0	0	2	1	1	2	10	8	0	2	5	2	3	2	1	5	19	7	1	2	3	13	7	14	30	9	21
desc	Descurainia					B	0	0	0	0	0	0	0	0	0	0	0	0	0	0	0	0	0	0	0	0	0	5	0	0	0	0	0	0	0	0	0	0
Caryoph.	Caryophyllaceae					B	3	4	8	8	6	3	2	6	3	4	11	24	18	6	3	8	3	8	12	9	14	23	3	1	4	3	11	4	2	2	2	3
chenop	Chenopodiaceae					B	1	0	1	0	0	0	0	0	1	1	0	1	0	0	0	1	0	1	0	1	0	1	0	0	0	0	0	0	1	0	1	2
Cichor.	Cichoriaceae					B	0	1	0	1	0	0	0	0	1	1	1	3	1	0	0	1	1	2	1	1	2	1	1	1	2	2	2	3	3	3	4	2
Cyperac.	Cyperaceae					B	53	30	30	18	53	68	87	71	74	81	104	86	80	115	123	73	110	120	218	210	145	79	185	109	169	24	11	20	52	58	61	27
dryas	cf. Dryas					B	0	0	0	0	0	0	0	3	0	1	2	3	1	0	0	0	0	2	0	1	0	2	1	0	2	4	0	1	0	0	0	0
Ericac.	Ericales					B	58	3	4	1	3	1	1	0	4	4	3	0	0	0	0	2	2	1	2	2	1	0	1	1	1	4	4	1	4	3	2	1
fab	Fabaceae					B	0	1	0	0	0	0	0	0	0	0	2	6	2	1	0	0	0	0	0	0	0	0	0	0	0	1	0	0	0	2	1	0
hip	cf. Hippuris					B	0	0	0	0	0	0	0	0	1	0	0	0	0	0	0	0	0	0	0	0	0	0	0	0	0	0	0	0	0	0	0	0
gena	Gentianaceae					B	0	0	0	0	0	0	0	0	0	0	0	0	0	0	0	0	0	0	0	1	0	0	0	1	0	0	0	3	0	0	0	0
gera	Geranium					B	0	0	0	0	0	0	0	0	0	0	0	0	1	0	0	0	0	0	0	0	0	0	0	0	0	0	0	0	0	0	0	0
Junc	Juncaceae					B	0	0	0	0	0	0	0	0	0	2	0	0	2	0	0	0	0	0	0	0	0	0	0	0	0	0	0	0	0	0	0	0
inder	Indeterminata					B	3	3	8	4	11	2	3	11	4	2	10	9	8	7	3	9	4	8	7	6	21	13	10	0	4	9	21	11	8	9	8	12
lam	Lamiaceae					B	0	0	0	0	0	0	0	0	0	0	0	0	0	0	0	0	0	0	0	0	0	0	0	1	0	0	0	0	1	0	0	0
lil	Liliaceae					B	0	0	0	0	0	0	0	0	1	1	0	0	0	1	0	1	1	0	0	0	0	0	0	0	0	0	0	0	0	0	0	0
Novos	cf. Novosieversia					B	0	0	0	0	1	0	0	1	0	0	1	1	0	0	0	0	0	0	0	1	0	0	0	0	0	1	0	0	0	0	0	3
onag	Onagraceae					B	0	1	1	1	1	0	0	1	1	1	0	0	0	0	0	0	0	0	0	0	0	0	0	0	0	0	0	0	1	0	0	0
pap	Papaveraceae					B	0	0	0	1	5	0	1	1	1	1	3	3	1	4	6	2	1	0	0	0	0	1	1	1	1	3	0	0	1	1	2	1
parn	cf. Parnassia					B	0	0	1	0	1	0	0	0	0	1	0	0	0	0	0	0	0	0	0	0	0	0	1	0	0	0	0	0	1	0	0	0
ped	cf. Pedicularis					B	0	0	0	0	0	0	0	0	1	0	1	1	0	0	0	0	0	1	0	1	0	0	0	0	0	0	0	0	0	0	0	0
poa	Poaceae					B	66	70	88	115	89	95	137	132	105	65	160	171	193	180	170	208	181	157	69	95	103	85	96	109	141	138	201	204	122	110	160	94
polem	Polemonium					B	0	1	0	1	1	0	0	0	1	1	2	0	1	0	0	1	1	0	1	2	2	3	1	0	1	1	1	0	1	0	0	0
Pol.vivipar	Polygonum viviparum-type					B	0	0	0	0	1	0	0	0	0	1	0	2	1	0	1	0	0	0	0	0	0	0	0	0	0	0	0	0	0	0	0	0
polygo	Polygonaceae					B	0	0	0	0	0	0	0	1	0	0	2	0	0	0	0	1	1	0	0	0	0	0	0	1	0	0	0	0	0	0	0	0
Prim	Primulaceae					B	0	0	0	0	0	0	0	0	0	0	0	0	0	0	0	1	0	0	0	0	0	0	0	0	0	0	0	0	0	0	0	0
pyrol	Pyrolaceae					B	0	0	0	0	0	0	0	1	1	2	0	0	0	0	0	1	0	0	0	0	0	0	0	0	0	0	0	0	1	0	0	0
ranu	Ranunculaceae					B	0	1	5	3	1	0	1	1	2	1	4	16	2	3	7	6	4	23	3	4	1	2	1	2	6	6	4	2	0	1	4	10
potent	Potentilla					B	0	1	0	0	0	2	0	0	1	1	4	6	3	0	0	3	2	3	0	3	0	14	1	0	2	0	3	3	12	1	2	9
comar	cf. Comarum					B	0	0	0	0	0	0	0	0	1	0	0	0	0	0	0	0	0	1	0	1	0	0	0	0	1	0	0	0	0	0	0	0
Rosac	Rosaceae					B	1	4	1	1	1	0	0	1	2	0	0	4	1	0	0	3	1	0	0	1	2	3	1	0	1	3	0	0	0	1	0	0
rubcham	cf. Rubus chamaemorus					B	1	0	0	0	0	0	0	0	0	0	0	0	0	0	0	0	0	0	0	0	0	0	0	0	0	0	0	0	0	0	1	0
sang	Sanguisorba					B	0	0	0	0	2	0	0	0	1	0	0	1	0	0	0	1	0	0	1	1	0	1	1	0	1	0	0	0	0	0	0	0
Rumex	Rumex\Oxyria					B	0	0	0	0	1	0	0	0	1	0	0	0	0	0	0	0	0	0	0	0	0	0	0	0	0	0	0	0	1	0	0	0
saus	Saussurea-type					B	0	0	0	0	0	0	0	0	0	0	0	0	0	0	0	0	0	0	0	1	0	1	0	0	0	0	0	0	0	0	0	0
Saxifrag	Saxifraga					B	1	5	0	9	5	2	3	2	2	1	6	11	10	1	0	2	1	4	7	4	3	13	16	6	7	12	14	3	3	7	7	14
Scrophu	Scrophulariaceae					B	0	0	0	0	0	0	0	0	0	0	1	1	0	0	0	0	0	0	0	0	0	0	0	0	1	0	1	3	0	0	0	0
Thalict	Thalictrum					B	0	0	0	1	0	0	0	1	2	0	0	0	1	3	0	0	0	0	0	0	0	0	1	2	0	0	0	0	0	0	0	1
Valer	Valeriana					B	1	0	2	1	1	2	1	0	2	1	1	5	1	1	1	1	0	0	0	1	0	0	1	0	1	2	0	0	0	0	1	0
Typha	Typha\Sparganium					C	0	0	0	0	0	0	0	0	0	0	0	0	1	0	0	0	0	0	1	1	0	0	0	0	0	2	0	0	0	1	1	0
potam	cf. Potamogeton					C	0	0	0	0	0	0	0	0	0	0	1	6	1	0	0	1	0	2	0	1	0	0	0	0	1	0	0	3	4	2	1	0
preqpol	pre-Quaternary pollen					Q	0	1	0	1	0	0	0	1	0	1	0	0	2	0	0	0	1	5	0	0	0	0	2	0	0	0	0	10	8	7	14	0
Botrych.	Botrychium					F	0	0	0	0	0	0	0	0	0	0	0	1	0	0	0	1	0	0	0	0	0	0	0	0	1	0	0	0	0	0	1	1
bryal	Bryales					F	0	1	4	0	0	0	0	8	0	1	1	2	1	8	25	0	4	0	4	3	7	16	10	1	0	10	4	9	1	2	0	20
enca	Encalypta					F	0	1	0	2	0	0	0	0	1	1	0	1	0	0	1	1	1	1	1	1	1	0	1	0	2	4	1	0	4	2	1	3
equi	Equisetum					F	1	0	0	0	1	1	1	1	2	3	0	1	0	2	1	0	0	0	1	1	0	3	2	0	0	0	4	0	0	1	1	1
Huperzia	Huperzia selago					F	0	0	0	0	1	0	0	1	1	1	0	0	1	0	0	0	0	1	0	1	0	0	1	0	0	0	0	0	0	0	0	0
clava	L. clavatum-type					F	0	0	0	0	0	0	0	0	0	0	0	0	0	0	1	0	0	0	0	0	0	0	0	0	0	0	0	2	0	0	2	1
compl	L. complanatun					F	1	0	0	0	0	0	0	0	0	0	0	0	0	0	0	0	1	0	0	0	0	0	0	1	0	0	0	0	0	1	0	0
lpung	L. pungens					F	1	0	0	0	0	0	0	0	0	0	0	0	0	0	0	0	1	0	0	0	0	0	1	0	1	1	1	1	0	0	1	0
l.sp	Lycopodium					F	0	0	0	0	0	0	0	0	0	0	0	0	0	0	0	0	0	0	0	0	1	0	1	0	0	0	0	0	0	0	1	1
l.anno	Lycopodium annotinum-type					F	0	0	0	0	0	0	0	0	0	0	0	1	1	0	0	0	0	0	0	0	0	0	0	0	0	0	0	0	0	0	0	0
om	Osmunda					F	0	0	0	2	0	0	0	0	0	0	0	0	0	0	0	0	0	0	0	0	0	1	0	0	0	0	1	0	0	0	1	1
polypod.	Polypodiophyta					F	0	1	0	2	0	0	1	0	0	0	2	0	0	0	0	1	1	3	0	1	2	2	1	1	4	1	2	2	5	2	4	4
ricc	Riccia					F	0	0	0	1	0	0	0	1	1	1	1	0	0	1	0	0	0	1	0	1	0	2	1	0	1	1	0	0	0	0	1	0
S.invol	S.involvens					F	0	0	0	0	0	0	0	0	0	0	0	0	0	0	0	0	0	0	0	0	0	0	0	0	0	0	3	0	0	0	0	0
Selagrup	Selaginella rupestris					F	0	0	1	1	0	1	0	0	1	1	1	5	2	0	0	1	1	1	1	2	4	1	1	1	1	1	0	2	1	1	3	1
Sphagnum	Sphagnum					F	6	0	0	0	1	2	0	2	1	1	1	3	0	0	0	2	1	2	1	1	0	1	3	0	2	2	7	6	7	7	6	8
cercor	Cercophora					L	0	0	0	0	0	0	0	1	0	1	0	1	0	0	0	0	0	0	0	0	0	0	0	0	0	0	0	0	0	0	0	0
gela	Gelasinospora					L	0	13	38	37	9	0	0	5	3	10	0	0	0	0	0	0	0	0	0	0	0	0	0	0	0	0	0	0	0	0	0	0
glom	Glomus					L	0	0	1	0	0	0	0	0	0	0	0	5	0	0	0	0	0	0	0	0	0	0	0	0	3	2	3	1	7	1	1	12
sordaria	Sordaria					L	0	0	0	0	0	0	0	0	0	0	0	0	0	0	0	0	0	0	0	0	0	0	0	0	0	4	0	0	0	0	0	0
spir	Spirogyra					X	0	0	0	0	0	0	1	0	0	0	0	0	0	0	0	0	0	0	0	0	0	0	0	0	0	0	0	0	0	0	0	0
spor	Sporormiella					L	0	0	0	0	0	0	0	0	0	0	0	1	0	0	0	0	0	0	0	1	0	27	2	0	0	0	0	9	2	2	7	7
vals	Valsaria					L	0	0	0	0	0	0	0	0	0	0	0	0	0	0	0	0	0	0	0	0	0	0	0	0	0	0	0	1	0	0	0	0
zygnema	Zygnema-type					X	1	4	4	1	13	0	1	2	1	0	1	1	6	3	6	4	3	2	8	2	4	3	4	2	2	7	1	0	2	1	3	3
redeposi	pre-Quaternary spores					Q	0	2	0	0	0	0	0	0	0	0	0	1	0	0	0	0	0	0	0	1	0	0	1	0	0	0	0	0	1	3	1	0
pediastr	Pediastrum					X	1	1	0	0	0	0	0	0	1	1	3	5	2	2	0	5	5	8	2	12	5	49	4	0	0	3	1	10	12	16	63	21
botr	Botryoccocus					X	2	0	0	1	1	3	1	2	0	1	7	7	3	5	1	6	6	9	0	2	6	3	5	6	8	4	4	7	9	13	17	14
...	Lycopodium spike						180	256	532	400	388	185	152	101	87	144	988	803	204	147	119	295	542	879	152	87	228	195	198	1485	362	136	245	598	642	555	796	1915
q.sam..	Volume of sample in ml.						3.1	1	1	1	1	1	1	3	3.3	2.2	1	1	1	2.4	2.7	1	1	1	3.5	3	3.1	3.2	3.5	1	2.7	3.9	2.9	1.86	2.2	1	1	1
c.spk..	Concentration of spike n/ml.						20848	20848	20848	20848	20848	20848	20848	20848	20848	20848	20848	20848	20848	20848	20848	20848	20848	20848	20848	20848	20848	20848	20848	20848	20848	20848	20848	20848	20848	20848	20848	20848
q.spk.	Volume or mass of spike						1	1	1	1	1	1	1	1	1	1	1	1	1	1	1	1	1	1	1	1	1	1	1	1	1	1	1	1	1	1	1	1
conc	Total pollen concentration						13898.7	28584.6	11991.5	19649.2	20471.9	38089.9	48965.4	24976.3	28102.3	23954.1	8166.17	11293.7	38323.5	20328	22580.5	27349.7	14078.2	9202.53	13911.7	29315	11326.6	10791.5	11221.2	4169.6	8574.68	10691.3	12147.9	6710.17	4974.35	13222.5	9690.65	3777.68
SUM(A)	Trees and shrubs		percent			P	167	210	131	197	190	149	112	112	160	179	44	32	20	15	21	34	27	37	23	13	61	35	19	46	36	45	55	63	91	105	96	117
SUM(Q)	Redeposited pollen and spores		percent			K	0	3	0	1	0	0	0	2	0	3	0	2	2	0	0	0	2	6	0	1	0	1	3	0	0	0	0	10	9	10	15	2
SUM(B)	Herbs		percent			P	205	141	175	180	191	189	245	251	227	185	343	403	355	329	327	353	339	351	332	354	323	288	354	251	366	227	359	295	246	247	274	230
SUM(C)	Aquatic		percent			N	0	0	0	0	0	0	0	0	0	0	1	6	2	0	0	1	0	2	1	2	0	0	0	0	1	2	0	3	4	3	2	0
SUM(F)	Spores		percent			M	9	3	5	8	3	4	2	13	7	9	6	14	5	11	28	6	10	9	8	11	15	26	22	4	12	20	23	22	18	16	22	41
SUM(L)	Fungi		percent			G	0	13	39	37	9	0	0	6	3	11	0	7	0	0	0	0	0	0	0	1	0	27	2	0	3	6	3	11	9	3	8	19
SUM(X)	Algae		percent			V	4	5	4	2	14	3	3	4	2	2	11	13	11	10	7	15	14	19	10	16	15	55	13	8	10	14	6	17	23	30	83	38
SSUM(P)	Pollen sum					A;B	372	351	306	377	381	338	357	363	387	364	387	435	375	344	348	387	366	388	355	367	384	323	373	297	402	272	414	358	337	352	370	347
SSUM(M)						A;B;F	381	354	311	385	384	342	359	376	394	373	393	449	380	355	376	393	376	397	363	378	399	349	395	301	414	292	437	380	355	368	392	388
SSUM(N)						A;B;C	372	351	306	377	381	338	357	363	387	364	388	441	377	344	348	388	366	390	356	369	384	323	373	297	403	274	414	361	341	355	372	347
SSUM(K)						A;Q;B;F	381	357	311	386	384	342	359	378	394	376	393	451	382	355	376	393	378	403	363	379	399	350	398	301	414	292	437	390	364	378	407	390
SSUM(G)						A;B;L	372	364	345	414	390	338	357	369	390	375	387	442	375	344	348	387	366	388	355	368	384	350	375	297	405	278	417	369	346	355	378	366
SSUM(V)						A;B;X	376	356	310	379	395	341	360	367	389	366	398	448	386	354	355	402	380	407	365	383	399	378	386	305	412	286	420	375	360	382	453	385

## Sheet: terrestrial_subset
Terrestrial subset for statistical analyses
Depth	Alnus_frut_type	Betula_sect_Nanae	Larix	Picea	Pinus_sg_Haploxylon-type	Pinaceae_indef	Pinus_sp	Salix	Artemisia	Asteraceae	Brassicaceae	Caryophyllaceae	Chenopodiaceae	Cichoriaceae	cf_Dryas	Ericales	Fabaceae	Indeterminata	cf_Novosieversia	Onagraceae	Papaveraceae	Poaceae	Polemonium	Ranunculaceae	Potentilla_sp	Rosaceae	Sanguisorba	Saxifraga	Thalictrum	Valeriana	Prequaternary_pollen	Sum
0.1	53	108	1	0	2	0	0	3	2	14	1	3	1	0	0	58	0	3	0	0	0	66	0	0	0	1	0	1	0	1	0	318
0.35	3	168	0	1	0	1	0	37	3	11	2	4	0	1	0	3	1	3	0	1	0	70	1	1	1	4	0	5	0	0	1	322
0.55	2	115	0	0	0	0	0	14	6	18	2	8	1	0	0	4	0	8	0	1	0	88	0	5	0	1	0	0	0	2	0	275
0.85	8	79	1	0	2	0	0	107	9	3	3	8	0	1	0	1	0	4	0	1	1	115	1	3	0	1	0	9	1	1	1	360
1.1	9	57	1	0	1	0	0	122	4	3	1	6	0	0	0	3	0	11	1	1	5	89	1	1	0	1	2	5	0	1	0	325
1.6	3	133	1	0	1	1	0	10	4	10	0	3	0	0	0	1	0	2	0	0	0	95	0	0	2	0	0	2	0	2	0	270
1.8	4	97	0	0	0	0	1	10	4	5	0	2	0	0	0	1	0	3	0	0	1	137	0	1	0	0	0	3	0	1	0	270
2.4	4	95	0	0	2	0	0	11	6	10	2	6	0	0	3	0	0	11	1	1	1	132	0	1	0	1	0	2	1	0	1	291
2.6	6	140	0	2	1	0	0	11	3	10	1	3	1	1	0	4	0	4	0	1	1	105	1	2	1	2	1	2	2	2	0	307
2.85	13	153	1	0	2	0	0	7	3	8	1	4	1	1	1	4	0	2	0	1	1	65	1	1	1	0	0	1	0	1	1	274
8.75	4	9	1	1	4	1	0	24	19	4	2	11	0	1	2	3	2	10	1	0	3	160	2	4	4	0	0	6	0	1	0	279
8.9	4	8	2	3	7	1	0	7	29	10	10	24	1	3	3	0	6	9	1	0	3	171	0	16	6	4	1	11	0	5	0	345
9	1	5	0	1	0	0	0	13	19	1	8	18	0	1	1	0	2	8	0	0	1	193	1	2	3	1	0	10	1	1	2	293
9.7	2	3	0	2	4	1	0	3	6	1	0	6	0	0	0	0	1	7	0	0	4	180	0	3	0	0	0	1	3	1	0	228
9.9	3	5	1	1	1	3	2	5	7	4	2	3	0	0	0	0	0	3	0	0	6	170	0	7	0	0	0	0	0	1	0	224
10.3	4	16	1	2	2	5	1	3	19	4	5	8	1	1	0	2	0	9	0	0	2	208	1	6	3	3	1	2	0	1	0	310
10.4	8	7	1	1	2	5	0	3	17	7	2	3	0	1	0	2	0	4	0	0	1	181	1	4	2	1	0	1	0	0	1	255
10.9	6	11	2	4	4	2	0	8	9	8	3	8	1	2	2	1	0	8	0	0	0	157	0	23	3	0	0	4	0	0	5	271
11.7	3	5	0	2	0	1	0	12	6	3	2	12	0	1	0	2	0	7	0	0	0	69	1	3	0	0	1	7	0	0	0	137
12.12	1	3	0	1	4	1	0	3	3	3	1	9	1	1	1	2	0	6	1	0	0	95	2	4	3	1	1	4	0	1	0	152
12.25	6	8	1	4	4	8	0	30	18	6	5	14	0	2	0	1	0	21	0	0	0	103	2	1	0	2	0	3	0	0	0	239
12.95	5	8	5	3	7	6	0	0	13	9	19	23	1	1	2	0	0	13	0	0	1	85	3	2	14	3	1	13	0	0	0	237
13.4	3	8	0	1	2	0	0	5	15	10	7	3	0	1	1	1	0	10	0	0	1	96	1	1	1	1	1	16	1	1	2	189
13.95	3	28	4	0	1	2	2	6	8	7	1	1	0	1	0	1	0	0	0	0	1	109	0	2	0	0	0	6	2	0	0	185
14.65	2	8	1	0	5	3	0	17	9	10	2	4	0	2	2	1	0	4	0	0	1	141	1	6	2	1	1	7	0	1	0	231
15.2	6	10	3	2	6	4	4	10	1	10	3	3	0	2	4	4	1	9	1	0	3	138	1	6	0	3	0	12	0	2	0	248
16	7	24	7	4	6	2	0	5	62	11	13	11	0	2	0	4	0	21	0	0	0	201	1	4	3	0	0	14	0	0	0	402
17	13	23	1	4	3	2	0	17	24	6	7	4	0	3	1	1	0	11	0	0	0	204	0	2	3	0	0	3	0	0	10	342
17.05	23	41	2	6	8	4	1	6	10	8	14	2	1	3	0	4	0	8	0	1	1	122	1	0	12	0	0	3	0	0	8	289
17.7	25	46	2	4	9	3	0	16	15	4	30	2	0	3	0	3	2	9	0	0	1	110	0	1	1	1	0	7	0	0	7	301
18.15	19	31	5	7	9	5	0	20	6	3	9	2	1	4	0	2	1	8	0	0	2	160	0	4	2	0	0	7	0	1	14	322
18.48	13	45	6	6	5	6	0	35	22	8	21	3	2	2	0	1	0	12	3	0	1	94	0	10	9	0	0	14	1	0	0	319

## Sheet: aquatic_subset
Swamp/aquatic subset for statistical analyses
Depth	Cyperaceae	cf_Parnassia	cf_Comarum	Typha_Sparganium	cf_Potamogeton	Equisetum	Sum
0.1	53	0	0	0	0	1	54
0.35	30	0	0	0	0	0	30
0.55	30	1	0	0	0	0	31
0.85	18	0	0	0	0	0	18
1.1	53	1	0	0	0	1	55
1.6	68	0	0	0	0	1	69
1.8	87	0	0	0	0	1	88
2.4	71	0	0	0	0	1	72
2.6	74	0	1	0	0	2	77
2.85	81	1	0	0	0	3	85
8.75	104	0	0	0	1	0	105
8.9	86	0	0	0	6	1	93
9	80	0	0	1	1	0	82
9.7	115	0	0	0	0	2	117
9.9	123	0	0	0	0	1	124
10.3	73	0	0	0	1	0	74
10.4	110	0	0	0	0	0	110
10.9	120	0	1	0	2	0	123
11.7	218	0	0	1	0	1	220
12.12	210	0	1	1	1	1	214
12.25	145	0	0	0	0	0	145
12.95	79	0	0	0	0	3	82
13.4	185	1	0	0	0	2	188
13.95	109	0	0	0	0	0	109
14.65	169	0	1	0	1	0	171
15.2	24	0	0	2	0	0	26
16	11	0	0	0	0	4	15
17	20	0	0	0	3	0	23
17.05	52	1	0	0	4	0	57
17.7	58	0	0	1	2	1	62
18.15	61	0	0	1	1	1	64
18.48	27	0	0	0	0	1	28
