# Supplementary material for: Sedimentary ancient DNA and pollen reveal the composition of plant organic matter in Late Quaternary permafrost sediments of the Buor Khaya Peninsula (north-eastern Siberia)
Source: Copernicus journal article supplement (doi:10.5194/bg-14-575-2017), 2017-02-07
Supplement: Supplementary file [file bg-14-575-2017-supplement-title-page.pdf › bg-14-575-2017-supplement-title-page.pdf]

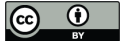

## *Supplement of*

# **Sedimentary ancient DNA and pollen reveal the composition of plant organic matter in Late Quaternary permafrost sediments of the Buor Khaya Peninsula (north-eastern Siberia)**

**Heike Hildegard Zimmermann et al.**

*Correspondence to:* Heike Hildegard Zimmermann (heike.zimmermann@awi.de)  
and Ulrike Herzschuh (ulrike.herzschuh@awi.de)

- bg-14-575-2017-supplement-title-page.pdf
- Supplement
  - S1-S3\_Zimmermann.docx
  - S4\_negative\_controls.xlsx
  - S5\_DNA\_dataset.xlsx
  - S6\_exoticDNAsequences.xlsx
  - S7\_Pollen\_counts.xlsx

The copyright of individual parts of the supplement might differ from the CC-BY 3.0 licence.
